# Supplementary material for: Development and Validation of a Novel Mitophagy-Related Gene Prognostic Signature for Hepatocellular Carcinoma Based on Immunoscore Classification of Tumor
Source: Hindawi journal article supplement (doi:10.1155/2021/5070099), 2021-10-25
Supplement: f1 [file 5070099.f1.zip]

Archive with 6 entries (6 files):
- 5070099.f1/Supplementary Information.docx
- 5070099.f1/Table S1.txt
- 5070099.f1/Table S2.txt
- 5070099.f1/Table S3.txt
- 5070099.f1/Table S4.txt
- 5070099.f1/Table S5.txt
