# Supplementary material for: Development and Validation of a Novel Mitophagy-Related Gene Prognostic Signature for Hepatocellular Carcinoma Based on Immunoscore Classification of Tumor
Source: Hindawi journal article supplement (doi:10.1155/2021/5070099), 2021-10-25
Supplement: f1 [file 5070099.f1.zip › 5070099.f1/Supplementary Information.docx]

**Supplementary Information**

Supplementary Table S1: MRGs included in analysis. Supplementary Table S2: The immune score of each HCC sample from TCGA cohort. Supplementary Table S3: Clinicopathologic characteristics of HCC patients. Supplementary Table S4: Differentially expressed genes between the risk groups in the TCGA cohort. Supplementary Table S5: Differentially expressed genes between the risk groups in the ICGC cohort.
