# Supplementary material for: Development and Validation of a Novel Mitophagy-Related Gene Prognostic Signature for Hepatocellular Carcinoma Based on Immunoscore Classification of Tumor
Source: Hindawi journal article supplement (doi:10.1155/2021/5070099), 2021-10-25
Supplement: f1 [file 5070099.f1.zip › 5070099.f1/Table S1.txt]

genes	Description
PRKN	Parkin RBR E3 Ubiquitin Protein Ligase
PINK1	PTEN Induced Kinase 1
MAP1LC3B	Microtubule Associated Protein 1 Light Chain 3 Beta
VDAC1	Voltage Dependent Anion Channel 1
MFN2	Mitofusin 2
FUNDC1	FUN14 Domain Containing 1
SQSTM1	Sequestosome 1
USP30	Ubiquitin Specific Peptidase 30
MAP1LC3A	Microtubule Associated Protein 1 Light Chain 3 Alpha
PHB2	Prohibitin 2
ATG13	Autophagy Related 13
UBC	Ubiquitin C
OPTN	Optineurin
GABARAPL2	GABA Type A Receptor Associated Protein Like 2
USP15	Ubiquitin Specific Peptidase 15
CLEC16A	C-Type Lectin Domain Containing 16A
BECN1	Beclin 1
ULK1	Unc-51 Like Autophagy Activating Kinase 1
DNM1L	Dynamin 1 Like
UBA52	Ubiquitin A-52 Residue Ribosomal Protein Fusion Product 1
TOMM20	Translocase Of Outer Mitochondrial Membrane 20
MFN1	Mitofusin 1
RHOT1	Ras Homolog Family Member T1
BNIP3L	BCL2 Interacting Protein 3 Like
BNIP3	BCL2 Interacting Protein 3
GABARAP	GABA Type A Receptor-Associated Protein
UBB	Ubiquitin B
ATG7	Autophagy Related 7
MAP1LC3B2	Microtubule Associated Protein 1 Light Chain 3 Beta 2
TOMM7	Translocase Of Outer Mitochondrial Membrane 7
TP53	Tumor Protein P53
AMBRA1	Autophagy And Beclin 1 Regulator 1
VPS13C	Vacuolar Protein Sorting 13 Homolog C
BCL2L13	BCL2 Like 13
PGAM5	PGAM Family Member 5, Mitochondrial Serine/Threonine Protein Phosphatase
ABCE1	ATP Binding Cassette Subfamily E Member 1
TBK1	TANK Binding Kinase 1
TOMM40	Translocase Of Outer Mitochondrial Membrane 40
CALCOCO2	Calcium Binding And Coiled-Coil Domain 2
RNF41	Ring Finger Protein 41
ATG5	Autophagy Related 5
PHB	Prohibitin
FBXO7	F-Box Protein 7
VPS13D	Vacuolar Protein Sorting 13 Homolog D
FIS1	Fission, Mitochondrial 1
RAB7A	RAB7A, Member RAS Oncogene Family
BCL2L1	BCL2 Like 1
RPS27A	Ribosomal Protein S27a
TIGAR	TP53 Induced Glycolysis Regulatory Phosphatase
TOMM70	Translocase Of Outer Mitochondrial Membrane 70
MUL1	Mitochondrial E3 Ubiquitin Protein Ligase 1
GABARAPL1	GABA Type A Receptor Associated Protein Like 1
USP8	Ubiquitin Specific Peptidase 8
HIF1A	Hypoxia Inducible Factor 1 Subunit Alpha
CNOT4	CCR4-NOT Transcription Complex Subunit 4
NBR1	NBR1 Autophagy Cargo Receptor
TOMM22	Translocase Of Outer Mitochondrial Membrane 22
TFEB	Transcription Factor EB
TBC1D15	TBC1 Domain Family Member 15
FKBP8	FKBP Prolyl Isomerase 8
TBC1D17	TBC1 Domain Family Member 17
FOXO3	Forkhead Box O3
SNCA	Synuclein Alpha
PELO	Pelota MRNA Surveillance And Ribosome Rescue Factor
KRAS	KRAS Proto-Oncogene, GTPase
HRAS	HRas Proto-Oncogene, GTPase
VDAC2	Voltage Dependent Anion Channel 2
HDAC6	Histone Deacetylase 6
OPA1	OPA1 Mitochondrial Dynamin Like GTPase
TAX1BP1	Tax1 Binding Protein 1
PRKAA1	Protein Kinase AMP-Activated Catalytic Subunit Alpha 1
UBE2L3	Ubiquitin Conjugating Enzyme E2 L3
MTX1	Metaxin 1
CISD1	CDGSH Iron Sulfur Domain 1
CSNK2A1	Casein Kinase 2 Alpha 1
ATG9A	Autophagy Related 9A
VCP	Valosin Containing Protein
HUWE1	HECT, UBA And WWE Domain Containing E3 Ubiquitin Protein Ligase 1
ATG14	Autophagy Related 14
CSNK2A2	Casein Kinase 2 Alpha 2
E2F1	E2F Transcription Factor 1
TFE3	Transcription Factor Binding To IGHM Enhancer 3
MAPK10	Mitogen-Activated Protein Kinase 10
MAPK9	Mitogen-Activated Protein Kinase 9
HTRA2	HtrA Serine Peptidase 2
SPATA18	Spermatogenesis Associated 18
MAPK8	Mitogen-Activated Protein Kinase 8
FANCC	FA Complementation Group C
