# Supplementary material for: Development and Validation of a Novel Mitophagy-Related Gene Prognostic Signature for Hepatocellular Carcinoma Based on Immunoscore Classification of Tumor
Source: Hindawi journal article supplement (doi:10.1155/2021/5070099), 2021-10-25
Supplement: f1 [file 5070099.f1.zip › 5070099.f1/Table S2.txt]

id	Immune_score
TCGA-2V-A95S-01	1683.4
TCGA-2Y-A9GS-01	102.88
TCGA-2Y-A9GT-01	1002.75
TCGA-2Y-A9GU-01	-621.19
TCGA-2Y-A9GV-01	335.85
TCGA-2Y-A9GW-01	913.22
TCGA-2Y-A9GX-01	1087.45
TCGA-2Y-A9GY-01	1200.87
TCGA-2Y-A9GZ-01	-832.05
TCGA-2Y-A9H0-01	239.59
TCGA-2Y-A9H1-01	589.85
TCGA-2Y-A9H2-01	65.1
TCGA-2Y-A9H3-01	1273.26
TCGA-2Y-A9H4-01	62.48
TCGA-2Y-A9H5-01	-258.43
TCGA-2Y-A9H6-01	483.33
TCGA-2Y-A9H7-01	-218.24
TCGA-2Y-A9H8-01	393.88
TCGA-2Y-A9H9-01	-138.3
TCGA-2Y-A9HA-01	-519.17
TCGA-2Y-A9HB-01	395.03
TCGA-3K-AAZ8-01	-47.12
TCGA-4R-AA8I-01	-314.59
TCGA-5C-A9VG-01	-785.46
TCGA-5C-A9VH-01	-437.17
TCGA-5C-AAPD-01	1195.39
TCGA-5R-AA1C-01	-125.46
TCGA-5R-AA1D-01	435.19
TCGA-5R-AAAM-01	533.8
TCGA-BC-4072-01	749.13
TCGA-BC-4073-01	1320.38
TCGA-BC-A10Q-01	-218.05
TCGA-BC-A10R-01	-453.24
TCGA-BC-A10S-01	563
TCGA-BC-A10T-01	-333.34
TCGA-BC-A10U-01	-463.3
TCGA-BC-A10W-01	50.22
TCGA-BC-A10X-01	268.69
TCGA-BC-A10Y-01	-56.29
TCGA-BC-A10Z-01	-1096.73
TCGA-BC-A110-01	986.37
TCGA-BC-A112-01	-70.85
TCGA-BC-A216-01	298.27
TCGA-BC-A217-01	108.35
TCGA-BC-A3KF-01	-466.83
TCGA-BC-A3KG-01	-577.98
TCGA-BC-A5W4-01	-1012.2
TCGA-BC-A69H-01	389.06
TCGA-BC-A69I-01	-48.91
TCGA-BC-A8YO-01	727.98
TCGA-BD-A2L6-01	-192.56
TCGA-BD-A3EP-01	873.15
TCGA-BD-A3ER-01	72.52
TCGA-BW-A5NO-01	-72.3
TCGA-BW-A5NP-01	-964.97
TCGA-BW-A5NQ-01	868.72
TCGA-CC-5258-01	83.4
TCGA-CC-5259-01	79.77
TCGA-CC-5260-01	152.92
TCGA-CC-5261-01	530.68
TCGA-CC-5262-01	557.69
TCGA-CC-5263-01	95.31
TCGA-CC-5264-01	-340
TCGA-CC-A123-01	-195.89
TCGA-CC-A1HT-01	1568.77
TCGA-CC-A3M9-01	2599.91
TCGA-CC-A3MA-01	-561.41
TCGA-CC-A3MB-01	-427.06
TCGA-CC-A3MC-01	-169.72
TCGA-CC-A5UC-01	-217.33
TCGA-CC-A5UD-01	-618.02
TCGA-CC-A5UE-01	-472.91
TCGA-CC-A7IE-01	643.05
TCGA-CC-A7IF-01	-742.58
TCGA-CC-A7IG-01	-9.74
TCGA-CC-A7IH-01	-819.2
TCGA-CC-A7II-01	-897.91
TCGA-CC-A7IJ-01	1433.52
TCGA-CC-A7IK-01	-983.35
TCGA-CC-A7IL-01	-789.54
TCGA-CC-A8HS-01	-848.81
TCGA-CC-A8HT-01	208.04
TCGA-CC-A8HU-01	-652.1
TCGA-CC-A8HV-01	-837.12
TCGA-CC-A9FS-01	-441.87
TCGA-CC-A9FU-01	-629.7
TCGA-CC-A9FV-01	1815.86
TCGA-CC-A9FW-01	-395.24
TCGA-DD-A113-01	-24.48
TCGA-DD-A114-01	1253.33
TCGA-DD-A115-01	-79.33
TCGA-DD-A116-01	-96
TCGA-DD-A118-01	-357.32
TCGA-DD-A119-01	-191.43
TCGA-DD-A11A-01	-653.43
TCGA-DD-A11B-01	-728.55
TCGA-DD-A11C-01	-15.53
TCGA-DD-A11D-01	-391.46
TCGA-DD-A1EA-01	276.2
TCGA-DD-A1EB-01	-314.52
TCGA-DD-A1EC-01	1990.28
TCGA-DD-A1ED-01	546.05
TCGA-DD-A1EE-01	-648.59
TCGA-DD-A1EF-01	63.8
TCGA-DD-A1EG-01	835.08
TCGA-DD-A1EH-01	-593.13
TCGA-DD-A1EI-01	-66.19
TCGA-DD-A1EJ-01	-184.32
TCGA-DD-A1EK-01	244.28
TCGA-DD-A1EL-01	-268.3
TCGA-DD-A39V-01	859.83
TCGA-DD-A39W-01	-508.82
TCGA-DD-A39X-01	20.95
TCGA-DD-A39Y-01	-457.29
TCGA-DD-A39Z-01	-649.2
TCGA-DD-A3A1-01	352.63
TCGA-DD-A3A2-01	-352.33
TCGA-DD-A3A3-01	-208.27
TCGA-DD-A3A4-01	-853.1
TCGA-DD-A3A5-01	-311.8
TCGA-DD-A3A6-01	791.33
TCGA-DD-A3A7-01	-212.19
TCGA-DD-A3A8-01	-613.44
TCGA-DD-A3A9-01	318.78
TCGA-DD-A4NA-01	109.39
TCGA-DD-A4NB-01	281.33
TCGA-DD-A4ND-01	541.13
TCGA-DD-A4NE-01	-597.05
TCGA-DD-A4NF-01	-786.41
TCGA-DD-A4NG-01	-79.19
TCGA-DD-A4NH-01	409.75
TCGA-DD-A4NI-01	445.41
TCGA-DD-A4NJ-01	361.78
TCGA-DD-A4NK-01	-540.25
TCGA-DD-A4NL-01	-111.58
TCGA-DD-A4NN-01	-831.75
TCGA-DD-A4NO-01	-339.6
TCGA-DD-A4NP-01	-298.01
TCGA-DD-A4NQ-01	101.76
TCGA-DD-A4NR-01	1836.16
TCGA-DD-A4NS-01	581.45
TCGA-DD-A4NV-01	-257.35
TCGA-DD-A73A-01	270.71
TCGA-DD-A73B-01	-725.32
TCGA-DD-A73C-01	-303.44
TCGA-DD-A73D-01	-962.42
TCGA-DD-A73E-01	-1115.43
TCGA-DD-A73F-01	1296.68
TCGA-DD-A73G-01	100.89
TCGA-DD-AA3A-01	-439.6
TCGA-DD-AAC8-01	-36.7
TCGA-DD-AAC9-01	507.01
TCGA-DD-AACA-01	-606.2
TCGA-DD-AACA-02	-962.97
TCGA-DD-AACB-01	897.14
TCGA-DD-AACC-01	2311.6
TCGA-DD-AACD-01	490.73
TCGA-DD-AACE-01	-461.16
TCGA-DD-AACF-01	185.99
TCGA-DD-AACG-01	188.65
TCGA-DD-AACH-01	-130.89
TCGA-DD-AACI-01	1415.59
TCGA-DD-AACJ-01	-445.52
TCGA-DD-AACK-01	-357.97
TCGA-DD-AACL-01	1275.36
TCGA-DD-AACN-01	-161.34
TCGA-DD-AACO-01	333.95
TCGA-DD-AACP-01	-787.77
TCGA-DD-AACQ-01	-885.28
TCGA-DD-AACS-01	-731.2
TCGA-DD-AACT-01	365.62
TCGA-DD-AACU-01	-105.23
TCGA-DD-AACV-01	-1058.32
TCGA-DD-AACW-01	-341.6
TCGA-DD-AACX-01	-205.52
TCGA-DD-AACY-01	-147.83
TCGA-DD-AACZ-01	1560.76
TCGA-DD-AAD0-01	-605.64
TCGA-DD-AAD1-01	736.91
TCGA-DD-AAD2-01	426.55
TCGA-DD-AAD3-01	165.93
TCGA-DD-AAD5-01	434.45
TCGA-DD-AAD6-01	-412.1
TCGA-DD-AAD8-01	-380.9
TCGA-DD-AADA-01	446.4
TCGA-DD-AADB-01	636.03
TCGA-DD-AADC-01	-607.18
TCGA-DD-AADD-01	-495.5
TCGA-DD-AADF-01	-166.16
TCGA-DD-AADG-01	-825.86
TCGA-DD-AADI-01	1002.06
TCGA-DD-AADJ-01	-120.71
TCGA-DD-AADK-01	198.18
TCGA-DD-AADL-01	-803.48
TCGA-DD-AADM-01	-38.41
TCGA-DD-AADN-01	1655.29
TCGA-DD-AADO-01	934.89
TCGA-DD-AADP-01	-208.15
TCGA-DD-AADQ-01	19.33
TCGA-DD-AADR-01	-10.3
TCGA-DD-AADS-01	901.7
TCGA-DD-AADU-01	-448.39
TCGA-DD-AADV-01	-332.76
TCGA-DD-AADW-01	-797.57
TCGA-DD-AADY-01	-797.31
TCGA-DD-AAE0-01	-478.88
TCGA-DD-AAE1-01	-143.96
TCGA-DD-AAE2-01	389.59
TCGA-DD-AAE3-01	-129.5
TCGA-DD-AAE4-01	1307.28
TCGA-DD-AAE6-01	-1141.2
TCGA-DD-AAE7-01	239.78
TCGA-DD-AAE9-01	-375.93
TCGA-DD-AAEA-01	151.51
TCGA-DD-AAEB-01	-235.29
TCGA-DD-AAED-01	-321.32
TCGA-DD-AAEE-01	-659.39
TCGA-DD-AAEG-01	-640.35
TCGA-DD-AAEH-01	962.91
TCGA-DD-AAEI-01	272.02
TCGA-DD-AAEK-01	962.71
TCGA-DD-AAVP-01	-384.25
TCGA-DD-AAVQ-01	1537.9
TCGA-DD-AAVR-01	1148.07
TCGA-DD-AAVS-01	-334.55
TCGA-DD-AAVU-01	-410.19
TCGA-DD-AAVV-01	886.87
TCGA-DD-AAVW-01	280.81
TCGA-DD-AAVX-01	419.12
TCGA-DD-AAVY-01	-699.67
TCGA-DD-AAVZ-01	-389.88
TCGA-DD-AAW0-01	526.45
TCGA-DD-AAW1-01	-530.14
TCGA-DD-AAW2-01	-670.36
TCGA-DD-AAW3-01	-726.86
TCGA-ED-A459-01	85.69
TCGA-ED-A4XI-01	523.63
TCGA-ED-A5KG-01	2934.36
TCGA-ED-A627-01	1307.98
TCGA-ED-A66X-01	393.97
TCGA-ED-A66Y-01	-1209.16
TCGA-ED-A7PX-01	-155.43
TCGA-ED-A7PY-01	-712.49
TCGA-ED-A7PZ-01	-969.5
TCGA-ED-A7XO-01	158.48
TCGA-ED-A7XP-01	-56.46
TCGA-ED-A82E-01	-173.15
TCGA-ED-A8O5-01	-672.53
TCGA-ED-A8O6-01	-522.85
TCGA-ED-A97K-01	-12.54
TCGA-EP-A12J-01	-397.63
TCGA-EP-A26S-01	-768.95
TCGA-EP-A2KA-01	883.29
TCGA-EP-A2KB-01	-479.63
TCGA-EP-A2KC-01	-355.14
TCGA-EP-A3JL-01	750.73
TCGA-EP-A3RK-01	1304.49
TCGA-ES-A2HS-01	-502.18
TCGA-ES-A2HT-01	203.46
TCGA-FV-A23B-01	-7.9
TCGA-FV-A2QQ-01	285.32
TCGA-FV-A2QR-01	-286.31
TCGA-FV-A3I0-01	-158.91
TCGA-FV-A3I1-01	394.06
TCGA-FV-A3R2-01	-300.93
TCGA-FV-A3R3-01	310.13
TCGA-FV-A495-01	740.54
TCGA-FV-A496-01	-911.66
TCGA-FV-A4ZP-01	770.4
TCGA-FV-A4ZQ-01	1301.66
TCGA-G3-A25S-01	173.62
TCGA-G3-A25T-01	-230.65
TCGA-G3-A25U-01	-626.03
TCGA-G3-A25V-01	537.96
TCGA-G3-A25X-01	928.85
TCGA-G3-A25Y-01	18.33
TCGA-G3-A25Z-01	-33
TCGA-G3-A3CG-01	-86.64
TCGA-G3-A3CH-01	61.59
TCGA-G3-A3CI-01	354.81
TCGA-G3-A3CJ-01	-255.93
TCGA-G3-A3CK-01	180.4
TCGA-G3-A5SI-01	-841.26
TCGA-G3-A5SJ-01	571.3
TCGA-G3-A5SK-01	420.83
TCGA-G3-A5SL-01	-453.14
TCGA-G3-A5SM-01	435.41
TCGA-G3-A6UC-01	-642.97
TCGA-G3-A7M5-01	-174.7
TCGA-G3-A7M6-01	-348.05
TCGA-G3-A7M7-01	-555.2
TCGA-G3-A7M8-01	-204.42
TCGA-G3-A7M9-01	-971.63
TCGA-G3-AAUZ-01	461.39
TCGA-G3-AAV0-01	-256.41
TCGA-G3-AAV1-01	-469.17
TCGA-G3-AAV2-01	-385.79
TCGA-G3-AAV3-01	802.6
TCGA-G3-AAV4-01	-453.81
TCGA-G3-AAV5-01	-402.93
TCGA-G3-AAV6-01	-888.52
TCGA-G3-AAV7-01	319.1
TCGA-GJ-A3OU-01	2261.38
TCGA-GJ-A6C0-01	566.85
TCGA-GJ-A9DB-01	-139.72
TCGA-HP-A5MZ-01	951.91
TCGA-HP-A5N0-01	3.72
TCGA-K7-A5RF-01	764.23
TCGA-K7-A5RG-01	2103.94
TCGA-K7-A6G5-01	277.58
TCGA-K7-AAU7-01	19.43
TCGA-KR-A7K0-01	-158.75
TCGA-KR-A7K2-01	18.94
TCGA-KR-A7K7-01	665.27
TCGA-KR-A7K8-01	1093.78
TCGA-LG-A6GG-01	-486.98
TCGA-LG-A9QC-01	-777.93
TCGA-LG-A9QD-01	12.64
TCGA-MI-A75C-01	85.29
TCGA-MI-A75E-01	298.94
TCGA-MI-A75G-01	-730.23
TCGA-MI-A75H-01	500.43
TCGA-MI-A75I-01	-362.74
TCGA-MR-A520-01	-335
TCGA-MR-A8JO-01	814.67
TCGA-NI-A4U2-01	-298.35
TCGA-NI-A8LF-01	-392.9
TCGA-O8-A75V-01	598.05
TCGA-PD-A5DF-01	359.93
TCGA-QA-A7B7-01	-490.89
TCGA-RC-A6M3-01	-287.06
TCGA-RC-A6M4-01	-937.54
TCGA-RC-A6M5-01	-283.5
TCGA-RC-A6M6-01	-510.49
TCGA-RC-A7S9-01	20.3
TCGA-RC-A7SB-01	-457.26
TCGA-RC-A7SF-01	-226.1
TCGA-RC-A7SH-01	-755.94
TCGA-RC-A7SK-01	-774.1
TCGA-RG-A7D4-01	1001
TCGA-T1-A6J8-01	-285.26
TCGA-UB-A7MA-01	-476.52
TCGA-UB-A7MB-01	-833.18
TCGA-UB-A7MC-01	-854.99
TCGA-UB-A7MD-01	404.8
TCGA-UB-A7ME-01	594.99
TCGA-UB-A7MF-01	1332.84
TCGA-UB-AA0U-01	211.94
TCGA-UB-AA0V-01	56.55
TCGA-WJ-A86L-01	-623.74
TCGA-WQ-A9G7-01	-730.63
TCGA-WQ-AB4B-01	53.23
TCGA-WX-AA44-01	-123.37
TCGA-WX-AA46-01	-103.3
TCGA-WX-AA47-01	-786.76
TCGA-XR-A8TC-01	-583.56
TCGA-XR-A8TD-01	1395.47
TCGA-XR-A8TE-01	-418.84
TCGA-XR-A8TF-01	-538.93
TCGA-XR-A8TG-01	-216.26
TCGA-YA-A8S7-01	1470.2
TCGA-ZP-A9CV-01	391.76
TCGA-ZP-A9CY-01	78.14
TCGA-ZP-A9CZ-01	537.38
TCGA-ZP-A9D0-01	-625.41
TCGA-ZP-A9D1-01	69.32
TCGA-ZP-A9D2-01	-276.75
TCGA-ZP-A9D4-01	-645.08
TCGA-ZS-A9CD-01	108.07
TCGA-ZS-A9CE-01	-858.09
TCGA-ZS-A9CF-01	-92.47
TCGA-ZS-A9CF-02	-355.31
TCGA-ZS-A9CG-01	-384.57
