# Supplementary material for: Development and Validation of a Novel Mitophagy-Related Gene Prognostic Signature for Hepatocellular Carcinoma Based on Immunoscore Classification of Tumor
Source: Hindawi journal article supplement (doi:10.1155/2021/5070099), 2021-10-25
Supplement: f1 [file 5070099.f1.zip › 5070099.f1/Table S3.txt]

Supplementary Table S3. Clinicopathologic characteristics .f HCC patients.
	TCGA cohort	ICGC cohort
No. of patients	365	243
Age (%)
<45	42(11.5%)	5(2.1%)
≥45	323(88.5%)	238(97.9%)
Gender (%)
Female	119(32.6%)	61(25.1%)
Male	246(67.4%)	182(74.9%)
Grade (%)
Grade 1	55(15.1%)	NR
Grade 2	175(47.9%)	NR
Grade 3	118(32.3%)	NR
Grade 4	12(3.3%)	NR
unknown	5(1.4%)	NR
Tumor Stage (%)
I	170(46.6%)	36(14.8%)
II	84(23.0%)	110(45.3%)
III	83(22.7%)	76(31.3%)
IV	4(1.09%)	21(8.6%)
unknown	24(6.6%)
T stage (%)
T1	180(49.3%)	NR
T2	91(24.9%)	NR
T3	78(21.4%)	NR
T4	13(3.6%)	NR
Tx	1(0.3%)	NR
unknown	2(0.5%)	NR
N stage (%)
N0	248(67.9%)	NR
N1	4(1.09%)	NR
Nx	112(30.7%)	NR
unknown	1(0.3%)	NR
M stage (%)
M0	263(72.1%)	NR
M1	3(0.8%)	NR
Mx	99(27.1%)	NR
Survival status
OS days (median)	556	780
Censored (%)	126(34.5%)	44（18.1%）
NR: not reported
