# Supplementary material for: Development and Validation of a Novel Mitophagy-Related Gene Prognostic Signature for Hepatocellular Carcinoma Based on Immunoscore Classification of Tumor
Source: Hindawi journal article supplement (doi:10.1155/2021/5070099), 2021-10-25
Supplement: f1 [file 5070099.f1.zip › 5070099.f1/Table S4.txt]

gene	group1mea	group2mea	logFC	p	FDR
NT5C1B-RDH14	0.000316741	4.75E-05	-2.737919384	1.18E-14	8.56E-13
PEBP4	1.539934793	0.607705139	-1.341425867	8.96E-07	5.10E-06
NR4A3	0.768535824	0.371902753	-1.04718708	8.07E-07	4.63E-06
OR8G5	0.027812469	0.100868868	1.858677224	0.024968629	0.043743314
SH2D5	0.041431538	0.09214511	1.153178238	0.012886418	0.024657004
CLEC3A	0.010208687	0.001566762	-2.703939386	5.59E-09	5.36E-08
SSX1	4.738295075	10.77942301	1.185840007	0.014879473	0.027889304
FRMD1	0.064407496	0.153348665	1.251515091	0.012236581	0.023574447
HTR2B	1.759949868	0.814286924	-1.111925193	0.005417975	0.011551955
KLC3	0.135325241	0.295461506	1.126539226	6.75E-06	3.10E-05
LPA	5.918544195	2.080078232	-1.508604565	1.50E-15	1.51E-13
RXFP4	0.029590316	0.089870364	1.602720339	0.009916108	0.019628599
SMIM22	0.617120631	1.65096999	1.419689465	0.004623362	0.010067871
AF241726.2	0.000447748	2.15E-05	-4.378461213	4.77E-14	2.21E-12
PRR23A	0.002362106	0.001087218	-1.119432874	3.95E-11	6.25E-10
C8orf88	0.247886634	0.593285964	1.259047165	0.000970339	0.002529835
USP50	0.065848618	0.031027131	-1.085622863	1.04E-08	9.42E-08
GTSF1	1.369632936	3.452728842	1.333947737	0.000510665	0.001445496
CDHR1	0.200081385	0.072860879	-1.457370639	0.003954369	0.008778406
NAA11	0.103633502	0.570028435	2.459543419	0.014838126	0.027825321
IGSF3	1.337557918	3.051147333	1.189750483	6.12E-12	1.22E-10
SLC1A5	4.979813383	11.94488364	1.262229216	5.42E-07	3.24E-06
AC140504.1	0.001602941	0.000387447	-2.048651264	5.34E-13	1.48E-11
KRTAP5-8	0.042892161	0.019941512	-1.104939187	1.59E-05	6.72E-05
RDH16	61.56675877	28.26742985	-1.123010903	4.97E-11	7.69E-10
CYP2C8	140.4029295	67.56139788	-1.055301954	1.51E-11	2.63E-10
CYP4A22	28.3594302	13.62683893	-1.057377613	2.09E-11	3.53E-10
C3orf52	0.070866351	0.193165281	1.446663145	3.61E-09	3.60E-08
HIST2H2AA4	0.037080244	0.016096667	-1.203888695	7.82E-08	5.75E-07
MBD3L2	0.002222179	0.000385448	-2.527365569	8.27E-14	3.33E-12
OR11H2	0.00070105	6.04E-05	-3.53609429	1.35E-13	4.89E-12
PKIA	0.085424582	0.309236407	1.85598699	1.87E-09	1.99E-08
TOP2A	4.051550415	10.71099765	1.402546865	2.94E-19	1.68E-16
STEAP4	1.761993927	0.793292914	-1.151283383	3.49E-09	3.48E-08
AC005670.2	0.000155049	2.15E-05	-2.848495357	1.37E-14	9.45E-13
SPP1	309.8556043	635.7336576	1.036826409	1.95E-06	1.03E-05
TMEM72	0.178266127	0.396500108	1.153288662	0.004243717	0.009337388
DRP2	0.010206303	0.024554694	1.266538558	0.008117832	0.016451123
AGTR2	0.048131063	0.023280836	-1.047825419	0.002108927	0.005058801
CA10	0.023713856	0.008103441	-1.549123711	0.011195181	0.021807839
SPACA7	0.172191388	0.074609536	-1.206581054	8.54E-06	3.84E-05
FCN2	3.125216889	1.328862719	-1.233764244	1.06E-05	4.66E-05
DLGAP2	0.02781183	0.009606583	-1.533603474	0.012548678	0.024092153
C3orf85	0.961503694	0.430457978	-1.159419995	1.39E-05	5.95E-05
TUBA1B	18.45613418	37.00828433	1.003747857	3.05E-20	2.84E-17
MTCL1	0.290857062	0.675470961	1.215583417	1.51E-08	1.32E-07
C6orf132	0.351561498	0.783782191	1.156675716	0.000521147	0.001471922
KRTAP24-1	9.89E-05	3.84E-05	-1.365386014	4.15E-13	1.20E-11
MFSD2A	15.76730389	6.614924835	-1.253139321	1.72E-10	2.35E-09
CD300LG	0.43542179	0.176726956	-1.300891495	5.37E-11	8.23E-10
FBXO41	0.160518979	0.342924421	1.095146763	1.38E-05	5.91E-05
DEFB131A	0.001462702	2.15E-05	-6.086337699	2.51E-14	1.45E-12
OR5H15	0.00024144	8.70E-05	-1.472314133	1.62E-13	5.67E-12
TXLNB	0.104832035	0.231665818	1.143965543	0.006497802	0.013550851
ELOVL7	1.256474417	3.24075215	1.366947392	8.96E-07	5.10E-06
SLC7A10	0.160649586	1.524990058	3.246810667	0.000163395	0.000527017
VWA5B2	0.054468552	0.144929098	1.411851864	0.009457992	0.018850087
GREM2	6.709638184	2.796836074	-1.262439273	2.80E-09	2.86E-08
CFHR4	20.70638836	7.852412439	-1.398868083	2.86E-18	9.81E-16
CYP11B2	0.724030636	0.024312416	-4.896285571	1.21E-09	1.34E-08
HAMP	24.66090296	6.667900287	-1.88692119	1.52E-05	6.44E-05
CKM	0.046028041	0.136614233	1.569522842	0.02901474	0.049857771
SMC1B	0.188332874	0.381217097	1.017327975	0.001146522	0.002933645
FOXM1	2.242735354	5.053687467	1.172077056	3.68E-17	7.01E-15
TMOD1	3.911612917	1.758451482	-1.153458082	1.83E-10	2.49E-09
CELF4	0.029720244	0.082794529	1.478089492	1.95E-05	8.04E-05
NOXO1	0.008502491	0.003563721	-1.254501327	9.39E-07	5.33E-06
GLYATL1B	0.1277154	0.042480633	-1.588055339	0.000975293	0.002541892
DEFB119	0.000848509	0.000130919	-2.69625466	1.38E-13	4.97E-12
BUB1B	0.830369448	2.036092646	1.29397794	6.98E-21	1.08E-17
CYP1A2	36.55366591	15.0029594	-1.284768992	9.51E-06	4.23E-05
TRIM49C	0.000591452	0.000235537	-1.32830896	5.49E-13	1.51E-11
ADGRD1	0.681819347	1.409281124	1.047497988	0.019590703	0.035378411
OR14A16	0.000447516	2.15E-05	-4.377712203	7.70E-15	5.99E-13
ZNF208	0.039923895	0.105518588	1.402172801	0.015022859	0.02809666
ZNF610	0.146687954	0.338125691	1.204809237	0.000519227	0.001467047
ZNF534	0.016189942	0.071551267	2.143879537	0.002714379	0.006312815
NKX1-2	0.18374702	0.059972631	-1.615344674	0.013154616	0.02509546
PPFIA4	0.040488403	0.121324576	1.583291183	6.86E-09	6.45E-08
AC100868.1	0.000651827	0.000153915	-2.082360192	7.17E-13	1.90E-11
OPRPN	6.892504511	3.042866264	-1.179597379	3.14E-05	0.000121926
CLEC2L	0.14627163	0.760108713	2.377555791	3.96E-06	1.94E-05
UGT8	0.043183872	0.216811035	2.327873683	2.71E-08	2.23E-07
FRAS1	0.187153981	0.782148175	2.063216207	2.69E-08	2.21E-07
TYRO3	0.593190947	1.327725377	1.162388288	6.63E-12	1.30E-10
DQX1	0.459728366	1.106119233	1.266653317	0.000223465	0.000693366
SHOX2	0.045221556	0.130553879	1.529562793	4.02E-05	0.000151993
TNFAIP6	0.191723519	0.847756976	2.144623421	2.60E-05	0.000103257
SOX4	4.062462186	9.807158445	1.271480802	2.61E-09	2.68E-08
FREM3	0.002966192	0.001005601	-1.560554038	3.73E-07	2.33E-06
MBD3L3	0.001077434	0.000405253	-1.410705339	5.50E-13	1.51E-11
GLS2	2.621470598	1.280409653	-1.033770906	3.85E-06	1.90E-05
CACNA1I	0.221548215	0.076186035	-1.54002222	0.003363758	0.007614118
COL24A1	0.050941274	0.177151223	1.798074471	2.05E-07	1.37E-06
OR13F1	0.001115098	0.000365532	-1.60909953	1.93E-13	6.48E-12
MCM10	0.441892905	1.009168996	1.191399118	7.73E-17	1.28E-14
PLCH1	0.071836591	0.153485415	1.095310785	1.08E-06	6.05E-06
PLA2G2A	352.5587547	103.5631399	-1.767353094	1.80E-08	1.54E-07
TICRR	0.20999261	0.440683631	1.069404751	3.49E-17	6.72E-15
SCARA5	0.421628045	0.20261717	-1.057214399	0.023534549	0.041485358
MAGEC2	1.920622833	7.545291348	1.974002375	0.027341832	0.047368482
ASS1	328.2693902	160.9711363	-1.028078208	1.25E-13	4.59E-12
CAMK2B	0.745450034	0.288986828	-1.367107917	6.17E-08	4.65E-07
ACTN3	0.018966233	0.042519014	1.16467493	0.012066001	0.023277799
KRT24	0.024058075	0.005224198	-2.203239744	1.66E-06	8.87E-06
PEG10	17.51311969	49.18087824	1.489661398	1.11E-09	1.24E-08
TMEM31	0.106456254	0.044265383	-1.266009895	0.001337766	0.003367668
PRR15L	3.621235371	7.496461994	1.049727915	0.0002575	0.000786425
ACER1	0.162846614	0.020413136	-2.99594395	4.16E-11	6.55E-10
GNRH2	1.066480795	0.143764568	-2.891077923	0.000124926	0.000416529
OR5P3	0.000286933	6.18E-05	-2.21510026	1.79E-13	6.13E-12
GABRR1	0.006310081	0.019039519	1.593266666	0.02565342	0.044781419
ZPLD1	0.092813352	0.779394892	3.069950208	3.76E-08	2.99E-07
SYNGR3	0.150668426	0.31669637	1.071723217	0.000716144	0.001943998
SPOCD1	0.050457458	0.160770362	1.671862038	6.27E-05	0.000224929
UPK3A	4.639020914	14.54261505	1.648394462	5.13E-07	3.09E-06
DSG2	3.832078997	10.18520748	1.410276161	6.04E-14	2.62E-12
ASPG	6.993045581	2.569536988	-1.444412489	1.59E-08	1.38E-07
OR4D11	0.000747283	0.000231959	-1.687786043	2.22E-13	7.18E-12
FITM1	2.061769619	0.954888184	-1.110479425	7.58E-19	3.44E-16
CA9	5.794561564	18.70011697	1.690275883	7.81E-09	7.23E-08
LRRC52	0.21908384	0.072241758	-1.60057817	0.005001771	0.010776253
TCP11X1	0.000213446	9.25E-05	-1.206994836	5.86E-14	2.56E-12
AC007731.5	0.002541467	0.001192992	-1.091077344	1.00E-12	2.49E-11
PLAC1	0.014213965	0.05485822	1.9483988	0.005041193	0.010847567
ETNPPL	33.35446028	12.43826958	-1.423093906	8.00E-17	1.31E-14
OR13C9	0.000435376	0.000128834	-1.756750441	9.15E-14	3.56E-12
TEX13A	0.00098448	0.000274857	-1.840682971	7.25E-13	1.91E-11
TEX49	0.051140157	0.005047256	-3.340885359	2.36E-06	1.22E-05
SOX9	6.276436879	13.47711434	1.102493944	2.30E-05	9.31E-05
KIFC1	2.964801587	6.565041096	1.146868484	6.87E-17	1.18E-14
KCNK9	0.164966245	0.397758323	1.269721263	5.20E-05	0.000190666
MGAT4C	0.124087305	0.030628823	-2.018393691	0.000535777	0.001509649
ERC2	0.019932668	0.040751496	1.031718215	0.000160814	0.000519896
DNASE1L2	0.656346394	0.314019872	-1.063601551	0.0031651	0.007223827
AC138647.1	0.002364775	0.000755976	-1.645289967	1.03E-12	2.56E-11
DZIP1L	0.179703375	0.372644882	1.052183943	6.58E-10	7.88E-09
ULBP1	0.056943214	0.152987905	1.42582177	0.000521146	0.001471922
LCE1D	0.002622468	0.001236748	-1.084373507	4.54E-13	1.30E-11
DHDH	0.347622012	0.702920294	1.015841667	6.22E-05	0.000223517
IGF2BP1	1.134045342	2.340645937	1.045428395	7.60E-06	3.46E-05
MPP2	0.070779264	0.164581506	1.217403568	8.36E-08	6.08E-07
SLC6A8	3.668185128	8.177934376	1.156670034	0.01435734	0.02703878
ERVFRD-1	0.037856034	0.016967286	-1.15776741	0.000180052	0.000574156
TMSB4X	253.0541604	532.3785973	1.073006379	1.69E-06	9.02E-06
BPY2	0.000241352	2.15E-05	-3.486914789	4.70E-14	2.21E-12
G6PD	6.474491894	19.45455988	1.58726946	8.32E-14	3.33E-12
VIL1	5.970959107	12.09578007	1.01846922	1.41E-09	1.54E-08
SEL1L3	3.846724388	7.859769552	1.030856547	0.001035751	0.002680891
TAT	212.312744	88.3354884	-1.265125915	4.50E-14	2.17E-12
PRDM9	0.024006099	0.057400404	1.257659896	0.006918845	0.014315577
TAF7L	0.139615488	0.067072585	-1.057663881	5.95E-10	7.21E-09
AC003002.1	0.000312088	2.15E-05	-3.857725627	3.27E-14	1.72E-12
SCG3	0.044612339	0.159968597	1.842274023	0.002887104	0.006663334
AC233723.1	1.02003355	0.468450831	-1.122647072	1.32E-10	1.86E-09
ZNF320	0.603623744	1.259940789	1.061634474	8.43E-10	9.77E-09
MTRNR2L10	0.138222162	0.065889248	-1.068873993	3.29E-09	3.32E-08
TPRX1	0.004110162	0.001931541	-1.089442941	1.99E-07	1.33E-06
C12orf75	2.967073527	8.455204729	1.510799009	7.05E-13	1.87E-11
SALL2	0.504009844	1.257637676	1.319192528	7.10E-10	8.39E-09
CSF3	0.018530153	0.008931199	-1.052948977	5.51E-07	3.29E-06
IL1RL1	0.212208813	0.08822126	-1.266286304	1.17E-08	1.05E-07
COL11A1	0.162576269	0.869008506	2.418253609	0.01269015	0.024326731
GALNT9	0.065137898	0.0316649	-1.04061265	0.00022609	0.000701088
GIMD1	0.128337147	0.001979539	-6.018630607	3.71E-14	1.89E-12
TCF24	0.010021999	0.033370026	1.735382514	0.020787867	0.037252476
CSN2	0.161798661	0.054259636	-1.5762484	2.09E-10	2.78E-09
CTAG2	2.18645212	9.153393759	2.065714988	3.15E-05	0.00012237
RIPPLY3	0.217723338	0.439139754	1.012184082	0.000590573	0.001643332
TCF23	0.08272354	0.031233196	-1.405217727	0.000222592	0.000691215
WFDC12	0.055552815	0.023800581	-1.222863237	0.000788467	0.002109143
CTSG	1.260438478	0.487704063	-1.369847806	0.000263027	0.00080067
MYEF2	0.140845161	0.320446543	1.185973708	2.19E-07	1.45E-06
NXPE1	0.006341166	0.001123146	-2.49720238	0.01932241	0.034979911
TRIM43B	0.003848986	0.000341192	-3.495821509	1.59E-12	3.72E-11
AL365214.3	0.001064066	0.000524397	-1.020856472	4.66E-10	5.73E-09
LAMP5	0.531865126	1.956958193	1.879480586	0.003139773	0.007173461
HJURP	1.399719047	2.990134997	1.095073342	8.38E-16	9.36E-14
TTK	0.728165922	1.612575229	1.147027337	1.76E-14	1.13E-12
FAM205A	0.009796965	0.002382536	-2.039836802	0.000960861	0.002506397
LRRC30	0.001155779	0.000324719	-1.831600347	1.19E-12	2.88E-11
INS-IGF2	0.396545261	0.090151276	-2.137065725	7.59E-11	1.12E-09
OR4X2	0.001247088	2.15E-05	-5.856264162	3.72E-14	1.89E-12
TNFRSF11B	2.081633404	4.189641626	1.009110826	0.004702863	0.010213597
PRAC1	0.066443834	0.024146456	-1.460323867	1.90E-08	1.62E-07
GRAMD4	18.18687349	8.209235139	-1.147577834	3.05E-10	3.89E-09
ANLN	1.158970103	2.925167695	1.335675984	3.15E-19	1.68E-16
TGFB2	0.53714549	1.219043683	1.182365012	0.003813525	0.008493865
KRTAP20-3	0.000811061	2.15E-05	-5.235583453	1.37E-14	9.45E-13
NKX1-1	0.010706051	0.002351351	-2.186864423	1.66E-10	2.29E-09
AZU1	0.091443016	0.038736328	-1.239185787	0.000815124	0.002170667
LYPD6	0.091243428	0.280347161	1.619421912	1.55E-07	1.06E-06
FCGBP	0.493662716	1.670167551	1.758395247	2.00E-05	8.22E-05
HASPIN	0.197697148	0.405050485	1.034809675	2.68E-15	2.53E-13
NPY	0.128054644	0.061713411	-1.053103647	0.000827255	0.002199548
ISL2	0.106927066	0.291596562	1.447346621	2.93E-05	0.000114807
GSDMC	0.124781699	0.307479249	1.30108269	0.000174449	0.000558123
SAA1	1597.065161	780.504657	-1.032944031	8.57E-06	3.85E-05
MOG	0.004580489	0.001997111	-1.197587431	0.000992368	0.002582033
SV2A	0.216100744	0.548987468	1.345069176	0.000588408	0.001637912
AMY1A	0.000420571	7.30E-05	-2.52662533	5.59E-15	4.71E-13
RCOR2	0.133128174	0.550495074	2.047913733	1.41E-07	9.74E-07
MARCOL	0.0173092	0.004919183	-1.815048462	1.95E-12	4.47E-11
NPNT	1.771266576	4.630797581	1.386479342	0.014416725	0.027143991
HTR3A	0.043865975	0.686593512	3.968281974	0.000998129	0.002594418
MFSD4A	0.236774384	0.488880566	1.045969048	0.028471516	0.049050001
ZNF391	0.121188531	0.29747606	1.295520392	2.38E-09	2.48E-08
RHCE	0.67576509	0.335247741	-1.011294214	7.61E-09	7.05E-08
SPINT1	7.188687788	16.05025426	1.1587958	2.26E-05	9.17E-05
CENPA	1.036734464	2.314041703	1.158368436	2.09E-16	3.04E-14
CYP26A1	1.044900844	0.411181321	-1.34551941	0.000727877	0.001970993
CTH	47.9700979	12.24227315	-1.97026392	1.44E-17	3.68E-15
CTNNA3	0.27069845	0.077723566	-1.800262622	6.79E-07	3.96E-06
SERPINB4	0.43180267	0.104486175	-2.047060102	0.000133927	0.000442236
FXYD3	1.633025918	3.96386005	1.279358339	0.002723235	0.006330547
LGALS9C	0.241223647	0.11905714	-1.018717204	0.015126132	0.028252054
AKAP4	0.000976312	0.000352694	-1.468927072	4.71E-10	5.80E-09
OR4D2	0.000544183	0.000165769	-1.714916416	2.05E-13	6.80E-12
C6orf223	0.808782679	2.294308786	1.504235569	1.03E-09	1.17E-08
GDF10	0.206133834	0.507933235	1.301057556	0.003619389	0.00812243
SLC6A13	2.767032359	1.160609472	-1.253456907	2.72E-12	5.95E-11
DDN	0.024481159	0.060587971	1.307359519	2.03E-06	1.06E-05
SLC25A48	0.186188226	0.073501723	-1.340911877	0.000371652	0.001091887
KRT77	0.005045407	0.001229292	-2.037143502	2.79E-07	1.79E-06
SLC6A14	0.020146973	0.363950574	4.175107555	0.00017653	0.000564195
AC093668.1	0.002605916	0.001182986	-1.139357955	2.41E-11	4.01E-10
APOBEC2	0.099363907	0.202930607	1.030192664	0.00758628	0.015518718
DLX2	0.029482093	0.11509207	1.964877601	0.025391965	0.044375254
TRAM1L1	0.24801701	0.710102941	1.51758911	1.98E-12	4.52E-11
ARHGAP36	1.108648877	0.033407857	-5.05247126	1.94E-08	1.65E-07
ZNF714	0.114425933	0.246840816	1.10916692	5.08E-11	7.82E-10
CFHR3	39.7995884	17.52233854	-1.183558181	3.32E-11	5.34E-10
KIAA1549L	0.025585343	0.061479923	1.264797804	0.00455207	0.00993794
ZNF93	0.194588357	0.464047403	1.253846797	1.44E-12	3.40E-11
DOCK3	0.043824734	0.103384572	1.238203659	0.001836723	0.004477582
PRB4	0.004342672	0.001152785	-1.913459254	1.59E-14	1.05E-12
AC117457.1	0.01128614	0.004670682	-1.272847178	8.39E-06	3.78E-05
FMO1	0.983935357	2.128370052	1.113113567	0.000120707	0.000403597
LCN6	0.068108076	0.02910739	-1.226440387	6.37E-10	7.66E-09
CCR3	0.091145265	0.209787474	1.202688921	6.38E-08	4.78E-07
CTNND2	0.895172614	2.112005395	1.238375714	0.000721338	0.001955689
HBZ	0.005775191	0.001695765	-1.76793257	2.67E-10	3.45E-09
NEUROD6	0.007592188	0.00181703	-2.062933771	7.49E-11	1.11E-09
HAVCR1	0.164131218	1.465929849	3.158894493	0.00048305	0.001374644
MMP10	0.212058294	1.482447353	2.805448056	1.63E-06	8.73E-06
ILDR1	0.37381822	0.971844534	1.378388656	1.44E-08	1.27E-07
MMP11	2.453405743	5.217002319	1.088435229	7.60E-05	0.0002667
LHFPL3	0.024167606	0.14753452	2.609906099	3.19E-06	1.60E-05
TUBAL3	0.022092232	0.067648664	1.614522234	0.017629644	0.032329048
LYPD2	0.501818041	0.150400342	-1.738356486	0.000251861	0.000771693
ENO2	0.774889736	2.069856115	1.417467543	0.000338063	0.00100294
INSL4	0.017794486	0.003964547	-2.166202366	3.00E-07	1.91E-06
OR8J1	0.00018696	4.05E-05	-2.207780264	1.36E-13	4.94E-12
SMR3A	0.758681964	0.339450009	-1.160296116	5.02E-11	7.75E-10
MAGEA12	1.363711409	4.344419267	1.671624969	2.04E-05	8.38E-05
COL9A2	0.689597667	1.538465193	1.157665005	1.87E-07	1.26E-06
GCNT3	0.527768495	2.113881659	2.001917475	8.09E-06	3.66E-05
VXN	1.026982793	0.500247859	-1.037697016	2.04E-12	4.63E-11
AL109827.1	0.001168156	0.000494043	-1.241523248	1.43E-13	5.12E-12
PCDHA1	0.092973093	0.207318527	1.156963897	0.000153613	0.000499225
NOTO	0.01353378	0.005731341	-1.239620201	0.000511825	0.001447981
MEP1B	0.349739285	0.134291294	-1.380914081	0.001846023	0.004498113
KCNB1	1.331392727	0.600978428	-1.14755108	4.69E-09	4.57E-08
CNTNAP1	0.44794338	0.978760192	1.127639038	4.22E-07	2.59E-06
CLRN2	0.067388192	0.026239919	-1.360732546	7.69E-10	9.02E-09
MUM1L1	0.237843266	0.615650076	1.372099405	0.000307328	0.000921149
IFNA10	0.000200932	2.15E-05	-3.222480114	3.52E-14	1.80E-12
NUF2	1.269556721	2.754025322	1.117216972	1.39E-14	9.48E-13
BIVM-ERCC5	0.0018277	0.000854339	-1.097147653	5.76E-09	5.52E-08
KRTAP4-16	0.002448399	0.000913077	-1.42302983	2.72E-13	8.56E-12
MAGEA6	2.289691916	6.497247417	1.504675152	2.29E-05	9.25E-05
CLRN1	0.006056159	0.00267357	-1.179635575	2.35E-11	3.94E-10
DEPDC1	0.595416853	1.202170146	1.013669136	7.89E-14	3.21E-12
KLHL1	0.000488223	0.00016787	-1.540200275	2.52E-11	4.17E-10
CEP55	0.729136348	1.867255684	1.356658962	7.73E-17	1.28E-14
TLX3	0.118872171	0.009450343	-3.652900433	2.49E-09	2.57E-08
RAX2	0.005811849	0.001179216	-2.301169452	4.04E-08	3.17E-07
SORCS1	0.019170705	0.0619328	1.691800246	0.000787807	0.002107839
FOSB	5.481658443	2.477508244	-1.14572258	4.58E-07	2.79E-06
IGSF1	0.864388687	1.817021341	1.071823269	0.003289294	0.007465283
RAB27B	0.296502348	0.664624682	1.16449634	8.03E-05	0.000280644
KIF20A	1.665775978	3.759315672	1.174275671	6.10E-16	7.24E-14
CD24	32.44333506	66.04710044	1.025573095	3.45E-07	2.17E-06
C5orf30	0.673490509	1.40779041	1.063703042	6.00E-08	4.53E-07
FAM133A	0.686167566	1.477674014	1.106695198	5.04E-05	0.000185664
CXCL1	3.844551666	13.81774239	1.845634648	0.003390741	0.007667319
ARMH2	0.092193903	0.045761109	-1.010549325	5.61E-05	0.000204059
TRIM43	0.00821326	0.000591058	-3.796583966	1.70E-11	2.92E-10
S100A11	78.35921117	221.8889507	1.501663049	0.000186566	0.000592358
OR1I1	0.003164448	0.00013686	-4.531181762	9.31E-13	2.34E-11
CAMK2A	0.23260453	0.076331035	-1.607537541	0.018451999	0.033609402
PRSS55	0.011340769	0.005281556	-1.102483514	2.42E-05	9.70E-05
AGRP	0.340799504	0.134793666	-1.338170529	0.01796481	0.032857729
ITGB6	0.128676584	0.41883346	1.702627158	0.022932014	0.040566967
OR10G4	0.000411834	2.19E-05	-4.230550931	2.25E-14	1.35E-12
SLC25A24	0.597379073	1.24004808	1.053677456	8.50E-08	6.16E-07
FMN2	0.013894878	0.077919064	2.487423153	0.000442572	0.001273814
PCDHA3	0.018327421	0.056918913	1.634904293	0.009790725	0.019420285
SPAG17	0.008897439	0.022193671	1.318686227	0.003917177	0.008704645
DRD1	0.515894752	0.164735322	-1.646926841	7.15E-09	6.68E-08
TRIM73	0.097549566	0.040385806	-1.272287123	6.38E-07	3.76E-06
GOLGA8Q	0.009385356	0.004493778	-1.062482754	6.25E-08	4.70E-07
OR2F2	0.001207595	0.000501713	-1.26720215	1.71E-13	5.92E-12
MMP14	13.92439337	34.97471532	1.328697838	2.13E-08	1.80E-07
OR6K3	0.000610099	0.000276808	-1.140160205	3.56E-13	1.07E-11
KCNE2	0.573881814	0.283209224	-1.018885405	3.34E-11	5.37E-10
DEFB128	0.000253514	2.15E-05	-3.557840911	2.43E-14	1.43E-12
ZNF695	0.035490083	0.131026815	1.88437425	3.95E-07	2.44E-06
KRTAP10-12	0.001326506	0.000571231	-1.215485425	2.31E-12	5.17E-11
CPO	0.188476903	0.088360027	-1.092921976	2.37E-10	3.11E-09
IL25	0.015648513	0.002147421	-2.865348669	7.81E-12	1.49E-10
OR4P4	0.000210778	2.15E-05	-3.291497379	3.50E-14	1.80E-12
CPS1	187.9322189	92.26061569	-1.026425597	7.51E-14	3.10E-12
FAM47C	0.007364528	0.002293633	-1.682958471	7.29E-10	8.59E-09
COL28A1	0.059395649	0.148959342	1.326489453	2.26E-06	1.17E-05
USH1G	0.022683894	0.052467513	1.209756109	0.00062834	0.001730218
PROM1	0.378573561	1.520999463	2.006374079	0.001084122	0.002790637
PLEKHB1	0.490505217	2.385061556	2.281686114	1.07E-08	9.64E-08
OR2T5	0.000552654	2.15E-05	-4.682149876	2.94E-14	1.60E-12
TAF11L12	0.019198052	0.000698199	-4.781178789	2.01E-14	1.26E-12
RNASE4	10.19331295	4.362857779	-1.22427767	9.73E-26	1.50E-21
GSTA3	0.12579786	0.034327187	-1.873683817	0.007799833	0.015892289
ZNF648	0.604989387	0.301698634	-1.003801672	6.63E-05	0.000236562
NT5DC4	0.019189643	0.045482475	1.244982907	0.00060368	0.001672567
S100A6	64.42249374	164.536272	1.352769249	0.014818354	0.02779177
OR1L4	0.000495043	0.000117552	-2.074252371	1.31E-13	4.77E-12
KCNQ4	0.137513819	0.282820328	1.040309215	0.02487658	0.043601954
OR9Q1	0.001513545	0.000674544	-1.165946528	4.05E-08	3.18E-07
RTKN2	0.105477478	0.263921445	1.323173607	1.69E-14	1.10E-12
KCNK4	0.00538954	0.001009039	-2.41718091	3.63E-08	2.89E-07
CYP11A1	3.237693377	1.604583705	-1.012767312	1.52E-10	2.11E-09
CKMT1B	0.097068384	0.211906526	1.126354631	0.011931037	0.023057802
CGA	0.302239356	0.142629548	-1.083418636	0.018012435	0.032933119
FOXD4L5	0.003164573	0.001012911	-1.643502915	2.41E-11	4.01E-10
OR1N1	0.003110816	0.001396709	-1.155261146	1.26E-11	2.24E-10
OR11H6	0.002534127	0.000825406	-1.618313267	3.72E-12	7.84E-11
CLDN18	0.066537262	0.336718785	2.339309804	1.39E-10	1.94E-09
CDCA2	0.399490267	0.888929232	1.153908217	3.41E-14	1.77E-12
NAT2	7.498850701	3.140188435	-1.255818366	6.32E-11	9.52E-10
ARNT2	0.368793804	0.90688769	1.29810948	7.42E-05	0.000261269
STOX1	0.258135897	0.53610167	1.054375852	2.13E-06	1.11E-05
GABARAPL1	29.16238355	14.19049414	-1.039183814	3.33E-19	1.71E-16
APOA5	149.6855029	71.77613485	-1.060358361	8.48E-14	3.36E-12
CCNB2	2.487589161	5.030985968	1.01609293	2.25E-15	2.16E-13
OAT	34.48086317	9.90782933	-1.799154968	0.000339995	0.00100809
ANKRD18B	0.014804121	0.046513844	1.651661382	0.000176878	0.000565189
PMAIP1	0.297201386	0.5999107	1.013306921	0.004055141	0.008968525
SULT4A1	1.429097327	0.632040434	-1.177015411	9.05E-05	0.000312556
SGPP2	0.437618246	1.619858192	1.888122723	7.56E-06	3.44E-05
PZP	1.637432677	0.531070642	-1.624459908	1.72E-06	9.16E-06
RFPL4B	0.246615441	0.87782504	1.831670289	0.015779673	0.029316895
OR9A2	0.000834786	0.000341275	-1.290473493	4.21E-13	1.22E-11
KRTAP12-1	0.001828782	0.000625681	-1.547384413	2.13E-14	1.31E-12
KIF2B	0.000961277	0.000474598	-1.018246631	2.73E-11	4.48E-10
HTR1D	0.694445522	1.551154012	1.159408509	0.003237028	0.007366172
OR6F1	0.001210464	0.000225207	-2.426238916	6.47E-13	1.74E-11
HPD	747.1351812	269.2014959	-1.472682871	2.84E-17	5.91E-15
GATD3A	0.949820975	0.405818177	-1.226822128	0.000835798	0.002221115
SFN	14.76683607	33.54080682	1.183556644	9.40E-06	4.18E-05
KCNK18	0.000454275	0.00010939	-2.054083817	2.93E-13	9.06E-12
GALNT17	0.285886319	0.091417413	-1.644900681	0.000875468	0.002312203
PNLIP	0.09955347	0.041578728	-1.259625989	1.47E-08	1.29E-07
CR1L	0.030343302	0.061655949	1.022862001	0.013813088	0.026163975
IRX4	0.005366306	0.002396477	-1.163014331	1.00E-07	7.15E-07
ASPDH	33.32787976	15.14243683	-1.138132146	1.54E-13	5.42E-12
FAM236D	0.000307861	0.00013461	-1.193488803	1.24E-13	4.56E-12
DMRTC1	0.00031173	0.000151383	-1.042091782	8.68E-13	2.21E-11
GIPR	0.172411771	0.401031871	1.217858619	0.019668743	0.035494433
GYPB	0.01148383	0.002356242	-2.285044295	4.26E-10	5.29E-09
TUSC3	1.256928292	3.331565084	1.406297732	0.001118827	0.002873258
PLCH2	1.579980072	0.636189341	-1.312378255	4.99E-08	3.83E-07
UST	1.431185062	0.506842613	-1.497600505	2.52E-05	0.000100365
BICC1	2.115125268	5.24996096	1.311563586	1.15E-05	5.03E-05
HTR3D	0.001654775	0.000812314	-1.026524375	1.25E-09	1.38E-08
EDDM3B	0.090542796	0.003270306	-4.791102224	1.62E-11	2.80E-10
TRIM45	0.660400021	1.331549413	1.011693897	1.16E-11	2.11E-10
ZNF676	0.157879312	0.334909553	1.084949389	0.003401573	0.007686183
ZNF98	0.022359869	0.062602131	1.485300038	0.008273877	0.016725593
PAGE1	5.973830346	13.61610432	1.188585824	2.16E-05	8.80E-05
KRTAP12-4	0.000935373	0.000438981	-1.091381306	2.83E-13	8.80E-12
TNFRSF11A	0.240452686	0.50582916	1.072897166	1.21E-05	5.23E-05
OR2T29	0.000434591	2.15E-05	-4.335433015	2.74E-14	1.54E-12
NKAIN1	0.026855159	0.065027441	1.27584936	0.000395507	0.001153393
TRIM49	0.000882832	0.000374001	-1.239098892	8.79E-12	1.66E-10
SLC4A1	0.132378984	0.036548255	-1.856799682	0.011070149	0.021592045
SLCO6A1	0.049725438	0.150173904	1.594578138	0.017185266	0.031608102
SPATA31D3	0.00015253	4.07E-05	-1.904617126	2.83E-13	8.80E-12
GPM6A	0.250106421	0.125027179	-1.000300346	1.06E-06	5.96E-06
TLR10	0.083018565	0.359134852	2.11301977	0.000655289	0.00179683
C1orf87	0.018536788	0.004101583	-2.176138688	1.17E-07	8.27E-07
CRHBP	2.21567246	0.742649254	-1.576991719	2.48E-09	2.56E-08
PKM	12.04534899	39.58796552	1.716585734	1.28E-12	3.07E-11
CCDC177	0.579076793	0.138329304	-2.065647868	2.40E-11	4.00E-10
STARD5	1.087687552	0.527262161	-1.044671818	8.59E-17	1.39E-14
LCN9	0.001566335	0.000729501	-1.102411546	2.01E-12	4.58E-11
ITGB4	2.138781857	4.685270441	1.131342981	0.000173414	0.000555387
FHOD3	0.152300305	0.453137381	1.573029682	6.88E-09	6.46E-08
FOXB2	0.001391224	0.000297717	-2.224339364	9.68E-12	1.80E-10
PLBD1	1.913205573	4.496585551	1.232838019	9.99E-05	0.000342052
HBD	0.282918336	0.108093014	-1.388112393	0.013266645	0.025277917
TPX2	5.200325837	12.20126414	1.230356703	2.22E-18	8.35E-16
OR1L1	0.000121813	2.15E-05	-2.500439533	1.37E-14	9.45E-13
RHOV	0.692362863	1.896845826	1.454002174	0.000110627	0.000374357
ST6GALNAC5	0.040604454	0.107147935	1.399894144	0.000403773	0.001173947
CMA1	0.556792354	0.19077219	-1.545288521	1.10E-05	4.82E-05
OR8K5	0.000307552	0.000134575	-1.192419208	5.81E-14	2.55E-12
TMEM132A	1.258156529	3.502062011	1.476893209	1.64E-06	8.77E-06
GPR50	1.935349663	0.028722386	-6.074274841	0.001311753	0.003307581
C8A	114.6984955	56.93623663	-1.010427425	1.04E-16	1.64E-14
CCNE1	1.889416085	5.447752156	1.527720624	5.08E-11	7.82E-10
PQLC2L	0.018269021	0.128054034	2.809281446	2.56E-05	0.000101759
ADH4	305.7979863	141.5603023	-1.111162159	7.11E-12	1.38E-10
C12orf56	0.060884541	0.160517297	1.398580899	3.92E-06	1.93E-05
MUC15	0.227669341	0.5514685	1.276338453	0.004895696	0.010580246
CDX4	0.000407665	4.14E-05	-3.298209025	1.64E-13	5.74E-12
DNAAF1	0.408800467	0.117710822	-1.796149875	4.95E-07	3.00E-06
DNAJB13	0.030474475	0.061954216	1.023601114	0.006705537	0.013921954
C1QL2	0.011127073	0.005523555	-1.01040506	1.50E-07	1.03E-06
OR10G9	0.000319614	2.19E-05	-3.864821181	6.94E-14	2.93E-12
SAA2	186.582673	58.35792175	-1.676814604	1.72E-06	9.17E-06
HEMGN	0.046522592	0.010797345	-2.107254832	9.29E-05	0.000319906
IFI27	101.9256129	38.11404487	-1.419122004	6.22E-07	3.67E-06
UGT1A10	0.128395159	0.795266964	2.630848428	0.000762727	0.00205096
PLK1	1.549755814	3.480162151	1.16711361	5.56E-16	6.75E-14
KRTAP15-1	0.000270119	0.000104046	-1.376372717	5.17E-13	1.44E-11
SPHK1	2.253170273	7.255945752	1.687207327	1.65E-05	6.94E-05
SLC30A8	0.004415816	0.065102757	3.881966641	2.32E-05	9.37E-05
RIMKLA	0.05205097	0.123256789	1.243670167	0.019957166	0.035947659
ZNF280B	0.033539615	0.077834268	1.214539325	0.007299834	0.015002366
AMBN	0.543396463	0.188759239	-1.525457913	0.02334526	0.041211244
TRIP13	0.909984409	2.365416836	1.378180706	4.19E-18	1.32E-15
LMO1	0.053361335	0.025886263	-1.043608052	0.011710358	0.022676781
ZNF705B	0.000114548	2.15E-05	-2.411721092	2.18E-14	1.31E-12
OR2W1	0.000252181	7.50E-05	-1.748802276	6.19E-14	2.66E-12
STRA6	0.065827557	0.162613488	1.304683363	0.005543454	0.011788534
OR2M2	0.00018128	2.15E-05	-3.073994859	3.82E-14	1.93E-12
KLHDC8A	0.101428329	0.213191997	1.07169263	0.005017993	0.010803675
G6PC2	0.017711476	0.008012562	-1.144348996	5.47E-07	3.27E-06
HBG1	0.002838282	0.00093799	-1.597373557	6.18E-12	1.23E-10
POF1B	0.491527077	1.515068301	1.624040036	3.32E-09	3.34E-08
COCH	1.079400647	2.176055551	1.01148493	0.001542686	0.00382731
ZNF415	0.186578243	0.423353956	1.182083605	0.019461136	0.03517754
NLRP2	0.072244426	0.481594074	2.736859445	0.002905881	0.006696596
HOXB8	0.031739354	0.141087876	2.152249362	0.028399234	0.048937367
SPTSSB	0.179595793	0.597899088	1.735148457	0.000256009	0.000782074
PRAMEF1	0.01051166	0.001948728	-2.431386175	1.15E-10	1.64E-09
EHF	1.254308118	2.517028595	1.00482982	0.005111471	0.010978879
GFRA3	0.328227788	0.833054357	1.34371325	0.004197466	0.009248817
CSAG1	2.272102093	6.531598616	1.523408475	0.000926693	0.002428359
BLID	0.008924554	0.003907335	-1.191595213	2.98E-09	3.04E-08
PIMREG	0.311658157	0.954605143	1.614939637	3.04E-11	4.94E-10
LRIT2	0.005066454	0.0008182	-2.630450567	4.42E-09	4.32E-08
PATE3	0.00094645	0.000448211	-1.078348893	2.21E-11	3.72E-10
GIMAP1-GIMAP5	0.000967267	0.00036829	-1.393073695	1.44E-12	3.40E-11
NMS	0.002257436	0.000568028	-1.99065014	1.07E-12	2.64E-11
AC011604.2	0.108163688	0.047074604	-1.200195391	0.000299746	0.000902104
CASKIN1	0.033778502	0.077028262	1.189282529	0.004371541	0.009584456
POMC	0.457178301	0.174764486	-1.387344886	4.07E-06	1.99E-05
GML	0.023421366	0.002498925	-3.228445589	7.89E-11	1.16E-09
SCT	0.92822224	0.355690297	-1.383848647	0.000705865	0.001917785
HIST1H4G	0.005655974	0.001107369	-2.352639616	2.79E-14	1.54E-12
SCGB3A2	0.036362721	0.014328881	-1.343534239	0.000189485	0.00060025
SGO2	0.475639789	0.996965891	1.06767474	1.31E-20	1.68E-17
AC008687.1	0.000144736	2.15E-05	-2.7492007	1.37E-14	9.45E-13
KCNK17	0.524201608	0.253883394	-1.045955743	3.35E-05	0.000129292
SFTPA1	0.038663119	0.008845456	-2.127949608	1.28E-07	8.88E-07
CDC20	5.467843316	14.33747675	1.390747339	8.64E-15	6.60E-13
ZNF556	0.016476399	0.068678031	2.059447729	0.009609217	0.019106944
PRAMEF18	0.00375926	0.001490369	-1.334778716	7.23E-12	1.40E-10
PRAMEF12	0.012531748	0.00183013	-2.775569644	4.94E-06	2.36E-05
TRPA1	0.014528149	0.052626425	1.856936493	0.016682702	0.03079392
FIGLA	0.018231259	0.009092714	-1.00363134	1.83E-05	7.60E-05
RSPO3	0.689175596	0.315451615	-1.127452882	0.0053521	0.011433628
FCN3	6.459087323	2.445587378	-1.401149314	7.55E-06	3.44E-05
RAD54L	0.479951512	1.109544921	1.20900751	3.89E-16	5.18E-14
LIN28B	0.161577465	0.687461899	2.089053759	0.007721762	0.015770834
PRODH	2.995928893	0.824730964	-1.861007904	1.29E-09	1.42E-08
GINS1	1.386069209	3.117256658	1.169277647	3.16E-19	1.68E-16
UBXN10	3.415643115	1.652253312	-1.047722355	9.11E-10	1.05E-08
BHLHA9	0.050053291	0.023381911	-1.098072086	6.05E-06	2.82E-05
OR52E8	0.152575298	0.046024805	-1.729037905	1.49E-06	8.04E-06
OR2T34	0.002355273	0.00114546	-1.039966977	3.54E-13	1.07E-11
KRTAP5-2	0.097468398	0.015258086	-2.67536056	1.12E-08	1.01E-07
KRT27	0.056238406	0.020913818	-1.427099275	1.25E-10	1.77E-09
DDR1	3.290269723	6.90700357	1.069854114	1.10E-11	2.01E-10
HOXA6	0.030849681	0.082357063	1.416636813	0.003765258	0.008396833
PAX1	0.001684391	0.000759428	-1.149241492	7.73E-07	4.44E-06
ZIK1	0.145265831	0.361668018	1.315970636	7.20E-07	4.18E-06
TMEM61	0.230032043	0.518491189	1.172484637	0.00037731	0.001106183
ZNF488	0.013698247	0.046754379	1.771110209	3.14E-06	1.58E-05
RNF17	0.044825637	0.159682186	1.832807375	0.004344222	0.00953432
IQCJ	0.000872511	0.000307069	-1.506609645	2.05E-13	6.80E-12
TEX47	0.001068233	0.000253214	-2.076794235	1.90E-12	4.37E-11
KDM4E	0.006461472	0.002548842	-1.34202117	1.74E-05	7.28E-05
ELOA3C	0.000414486	2.15E-05	-4.26709753	4.70E-14	2.21E-12
AC131097.2	0.766311362	0.303606878	-1.33572622	8.32E-05	0.00028983
GPR182	0.29692866	0.125634	-1.240889398	9.79E-09	8.91E-08
IGF2BP2	2.526585718	5.143547741	1.02557467	5.76E-11	8.75E-10
ZP4	0.001439344	0.00020721	-2.796248019	5.88E-14	2.56E-12
MS4A6E	0.037560181	0.017626853	-1.091429103	0.006544862	0.013643459
ITPR3	0.678111092	1.991591461	1.554328188	2.41E-05	9.66E-05
ACTL9	0.001195427	0.000371209	-1.687223942	6.39E-12	1.26E-10
GCM2	0.001274341	0.000400957	-1.668232906	9.75E-13	2.43E-11
GYPA	0.020429154	0.00918362	-1.153494607	3.95E-09	3.89E-08
TSPAN15	5.0475076	10.14563683	1.007216341	0.002288788	0.005442003
OR5A2	0.000460015	2.15E-05	-4.417453693	2.73E-14	1.54E-12
NCAPG	1.324547161	2.785034147	1.072195804	6.72E-15	5.43E-13
AC006538.2	0.001130672	0.000431858	-1.388551024	5.47E-14	2.43E-12
GLYAT	30.91389698	13.64038242	-1.180371438	1.02E-10	1.48E-09
ZNF239	0.395583322	0.884971138	1.1616488	1.25E-08	1.11E-07
DEFB132	1.384935042	0.366164981	-1.919252583	4.82E-08	3.71E-07
CDY2A	0.000132439	6.40E-05	-1.049191923	5.56E-13	1.53E-11
INAVA	0.862220968	1.878172959	1.123200373	6.00E-06	2.80E-05
H3.Y	0.029751239	0.008772812	-1.761838534	2.42E-07	1.58E-06
ZC3HAV1L	0.226363334	0.516269612	1.189484392	2.08E-08	1.76E-07
SLC39A12	0.013781449	0.005881358	-1.228506264	0.000431045	0.001246268
ANTXRL	0.006025925	0.002922751	-1.043855951	2.13E-05	8.71E-05
ANKLE1	0.091659744	0.191756091	1.064912249	0.011731131	0.022705605
CDK1	2.642407083	5.344491939	1.016200066	2.82E-14	1.55E-12
MYBL2	4.080716181	12.94178405	1.665142231	1.72E-19	1.11E-16
NEURL3	1.580748251	3.993568104	1.337070693	2.25E-08	1.88E-07
OR51F2	0.000395381	0.000197645	-1.00033318	3.29E-13	1.00E-11
TAS2R16	0.000951361	2.15E-05	-5.465766863	4.77E-14	2.21E-12
AMELX	0.005723133	0.001720628	-1.73386976	9.98E-12	1.85E-10
MMP12	0.611029035	2.816617116	2.204650619	2.42E-05	9.71E-05
MYO18B	0.261702585	0.563668572	1.106918957	0.001140535	0.002920256
NKX2-4	0.00805905	0.002698887	-1.578245139	1.20E-09	1.33E-08
DEFB104A	0.000767487	2.15E-05	-5.155914759	4.49E-14	2.17E-12
OR4C3	0.002318493	0.000117902	-4.297526213	8.52E-14	3.36E-12
MST1R	0.390216175	0.830047478	1.088920276	0.002369436	0.005612991
MTRNR2L6	0.102208409	0.045706248	-1.161050605	1.17E-07	8.21E-07
CIP2A	0.443510688	1.035994966	1.223976217	3.53E-20	2.87E-17
GNMT	94.87698698	42.26040125	-1.166751729	2.22E-10	2.92E-09
MTRNR2L11	0.014336456	0.00652617	-1.135379887	9.20E-08	6.61E-07
KRTAP4-9	0.00040965	0.000102514	-1.998571737	4.10E-14	2.03E-12
CCDC185	0.020227125	0.090211356	2.157017775	5.25E-05	0.000192376
NR0B1	0.054892289	0.715222689	3.703717105	0.003783321	0.008431859
PRR27	0.014703976	0.00690046	-1.091441815	0.000326249	0.000970692
ZNF66	0.07324092	0.165509532	1.176192484	1.77E-09	1.89E-08
PRAME	1.203433759	4.512520097	1.906776624	1.92E-07	1.29E-06
EPHB3	0.287695541	0.939083628	1.706710778	0.009135413	0.018270826
POTEB	0.000204662	2.15E-05	-3.249017171	4.77E-14	2.21E-12
DEPDC1B	0.856186596	2.154137668	1.331113299	4.16E-17	7.68E-15
CYP2S1	0.755906303	1.690394771	1.161080886	0.000260503	0.000793757
LCE2D	0.08970622	0.042204163	-1.087822694	0.006580173	0.013707806
FABP6	0.139082689	0.674147317	2.277121028	3.84E-05	0.000145958
SOX1	0.150908383	0.005274858	-4.838396825	1.86E-08	1.59E-07
CNDP1	1.627192824	0.737786387	-1.141110146	1.21E-06	6.70E-06
PPP1R14D	0.732417629	1.542960773	1.074962963	0.00173442	0.004258468
CENPF	1.400132053	2.850023655	1.025410993	4.11E-15	3.64E-13
AL772284.2	0.005745937	0.001680896	-1.77331183	4.06E-08	3.19E-07
EDDM3A	0.678565213	0.024131368	-4.813505836	6.57E-08	4.91E-07
NPY5R	0.088843286	0.042023157	-1.08007819	0.009818411	0.019466267
TMEM273	2.307226344	1.13486272	-1.023641751	2.15E-08	1.81E-07
CXCL5	0.672181965	6.155608327	3.194977698	0.000861543	0.002280103
CCDC105	0.001983883	0.000610735	-1.699708777	9.23E-10	1.06E-08
OR9G1	0.000253676	9.20E-05	-1.463173784	1.24E-13	4.57E-12
NDRG1	15.92130666	35.7517999	1.167057133	1.38E-08	1.22E-07
LRRIQ1	0.003997294	0.015992268	2.000278872	0.000205842	0.000646629
CPLX4	0.020948765	0.006580162	-1.670670176	0.00013425	0.000443114
KRTAP10-6	0.021079569	0.00619778	-1.766021806	1.58E-07	1.08E-06
SLC22A1	113.0510148	53.36477964	-1.083014149	2.34E-10	3.07E-09
BCAT1	0.37922475	0.93783332	1.306278414	0.000679521	0.001853401
TAS2R7	0.00105703	0.000189129	-2.482572511	2.47E-13	7.83E-12
CTSE	0.840168322	3.08735727	1.877622146	2.66E-05	0.000105343
DEFB103B	0.00090867	0.000135222	-2.748429578	6.33E-14	2.70E-12
SLC16A11	16.78739555	7.799982449	-1.10583564	1.09E-08	9.78E-08
RBP2	0.413586335	2.302810089	2.477135015	0.004276984	0.009402589
CAPN6	0.243307511	2.335449491	3.26284748	0.000643478	0.001768218
WNT7B	0.150558445	0.559123614	1.892843639	0.005680191	0.012042785
PRR11	0.988902182	2.102577097	1.088258974	7.35E-17	1.25E-14
OR5K3	0.000437966	4.66E-05	-3.231872303	2.78E-14	1.54E-12
PRAMEF2	0.266602004	0.070468754	-1.919632024	3.84E-09	3.80E-08
MC2R	0.004992139	0.001120022	-2.15613059	7.26E-09	6.76E-08
LIMS4	0.000104336	2.15E-05	-2.277005003	2.51E-14	1.45E-12
COLEC10	1.781994711	0.786542827	-1.179895828	3.89E-07	2.41E-06
TMEM35A	0.027166832	0.09492567	1.804951961	0.006053686	0.012727924
NOS2	0.590965043	0.277164795	-1.092328775	3.96E-05	0.000150093
PRKG2	0.009948004	0.030952732	1.637587808	0.019153445	0.034714937
KIF11	1.179830544	2.372827064	1.008027294	1.23E-16	1.90E-14
TBC1D3I	0.001341101	0.000573386	-1.225839383	3.33E-09	3.35E-08
KCNH7	0.025656561	0.053879891	1.070419128	6.05E-05	0.000218208
C1orf116	0.514169445	1.645536623	1.678242352	4.52E-05	0.000168551
IGSF11	0.019310938	0.043611242	1.175281819	0.001665359	0.004105898
TKTL1	0.110101949	2.204621501	4.32361908	0.015167543	0.028322541
KRTAP12-3	0.006823382	0.003025958	-1.173094856	1.07E-11	1.95E-10
IFNA2	0.000228541	6.48E-05	-1.818019057	5.64E-13	1.55E-11
CYP39A1	6.612308376	3.26615776	-1.017559532	7.08E-05	0.000250488
PKIB	1.589702821	3.216081897	1.016547051	0.003273528	0.007437163
SKA1	1.232262667	2.513063974	1.028137587	7.78E-13	2.02E-11
OR2J2	0.002705725	0.000521351	-2.375689394	2.13E-12	4.80E-11
EPHA6	0.015081277	0.070453556	2.223913961	0.0056456	0.011981259
ZNF90	0.06943859	0.215485036	1.633778129	6.73E-05	0.000239733
MMP9	5.661565441	13.98501206	1.304608575	0.001498547	0.0037286
AP000781.2	0.746839056	0.373218363	-1.000777402	1.61E-09	1.73E-08
OR2M7	0.000149909	4.96E-05	-1.595876747	8.63E-14	3.39E-12
RD3L	0.007410459	0.002339205	-1.663544525	1.91E-09	2.03E-08
ERCC6L	0.242817006	0.496471864	1.031842498	1.70E-14	1.10E-12
AC129492.3	0.000325585	2.15E-05	-3.918808608	2.97E-14	1.60E-12
ESR1	0.912799545	0.381972035	-1.256831052	1.70E-10	2.33E-09
PPARGC1A	7.195874297	3.323558563	-1.114441209	5.12E-13	1.43E-11
NOS1	0.06151766	0.0121376	-2.341517467	0.000733107	0.001983148
TMPRSS11A	0.006710098	0.001496677	-2.164570887	1.74E-07	1.17E-06
CMC4	0.000350913	8.65E-05	-2.020365677	4.52E-14	2.17E-12
OR2Y1	0.00029226	0.000117608	-1.313266022	6.06E-14	2.62E-12
TAS2R1	0.015000867	0.004677535	-1.681225514	0.000981141	0.002555408
OR2A2	0.001572204	0.000441381	-1.832692687	4.70E-12	9.64E-11
EPHX4	0.089893124	0.194306746	1.112053317	1.72E-05	7.22E-05
KRTAP2-4	0.000157001	2.15E-05	-2.866551068	2.97E-14	1.60E-12
CDCP1	0.416972865	1.072933434	1.363535166	3.68E-05	0.000140922
OR5D16	0.00010325	2.15E-05	-2.261921523	1.89E-14	1.20E-12
GPR6	0.000666091	0.000168873	-1.979780673	2.24E-10	2.95E-09
GDF2	0.539878565	0.23885489	-1.176500524	0.000112522	0.00037952
NPFFR2	0.358275951	0.793633686	1.147402057	0.000654102	0.001793902
FOXJ1	0.660717394	1.8281478	1.468277482	2.43E-06	1.25E-05
ADRA1A	1.383689051	0.640564623	-1.111103741	5.68E-05	0.000206207
FNDC5	14.1929317	6.82752543	-1.055737937	1.32E-05	5.66E-05
PTGES3L-AARSD1	0.006632824	0.013821715	1.059241387	0.000120456	0.000402852
HYPM	0.016701176	0.00780647	-1.097207548	2.59E-06	1.32E-05
RFPL1	0.009671771	0.004079614	-1.245347555	6.22E-05	0.000223618
TMEM238L	0.242758156	0.090836985	-1.418168032	0.000353811	0.001044636
ANKRD34C	0.009884679	0.003976854	-1.313566546	0.000226836	0.000703259
OR4F3	0.000170301	2.15E-05	-2.983861542	3.04E-14	1.62E-12
DMBT1	0.077715392	1.527292592	4.296632296	0.008359192	0.016889204
AL592490.1	0.000178535	7.64E-05	-1.224159838	2.80E-13	8.77E-12
PPBP	0.398020884	0.12777882	-1.639195403	2.14E-05	8.75E-05
TRNP1	7.02941401	15.21771558	1.114275471	9.17E-08	6.59E-07
PPP1R3A	0.024394155	0.010697743	-1.189229009	5.61E-08	4.27E-07
PLTP	9.054268897	21.48963005	1.246970588	0.0168641	0.031110139
OR52I2	0.002711005	0.000552289	-2.29533111	4.15E-13	1.20E-11
SH2D7	0.008418977	0.017841714	1.083537355	0.015271275	0.028496164
PRAMEF8	0.141802923	0.043086297	-1.71858625	8.06E-08	5.90E-07
SCRN1	1.180302523	2.861552296	1.277641289	0.00034129	0.001011735
KRT19	6.745689045	23.67088024	1.811075635	0.006145863	0.012900625
IGF2BP3	0.183075791	0.688068006	1.910110129	3.56E-10	4.50E-09
MMP7	4.19428682	11.7832791	1.490243647	0.006183078	0.012969917
PLEKHG4	0.261310744	0.613167755	1.230515385	0.000180057	0.000574156
SPINT3	0.102808658	0.034846122	-1.560891754	8.35E-11	1.22E-09
PRAMEF19	0.007211953	0.003008777	-1.261212726	2.87E-09	2.93E-08
SCGB2A2	0.047983784	0.006762016	-2.827021581	2.90E-07	1.85E-06
RCL1	10.18664674	4.772837629	-1.093760059	4.15E-18	1.32E-15
PPP1R14C	0.242237273	0.609913933	1.332184807	0.025360147	0.044328525
SULT1B1	3.847280505	1.787228294	-1.106115089	9.57E-09	8.73E-08
PCDHA2	0.006337732	0.020284642	1.678349336	0.007744515	0.01579873
MAGEA8	0.125430769	0.798466613	2.670340785	0.022024211	0.03914094
AC009119.2	0.276381514	0.137454116	-1.007711017	1.28E-16	1.93E-14
SEMG2	0.000958209	0.000410595	-1.222622583	1.01E-13	3.84E-12
AURKB	2.531366774	5.333264305	1.07510227	1.14E-10	1.63E-09
MAGEA3	2.605542176	8.364989192	1.682780068	9.05E-07	5.14E-06
MYH3	1.260192133	0.355320715	-1.826450002	1.40E-06	7.63E-06
KRTAP2-2	0.000338395	2.24E-05	-3.918857747	2.58E-14	1.48E-12
OR2AP1	0.00021226	0.000101741	-1.060927175	1.30E-13	4.76E-12
C1QL4	0.130316375	0.326563633	1.325345764	1.71E-05	7.16E-05
LYZ	122.8831914	321.4659994	1.387378565	0.000366754	0.001079544
EFHC2	0.025106916	0.096954835	1.94922803	2.44E-05	9.75E-05
REG1B	5.290019951	0.666335492	-2.988952518	0.000231321	0.000715439
AC008763.3	0.000919409	0.000185725	-2.307536155	4.04E-13	1.19E-11
TET1	0.106941735	0.236017942	1.142071548	2.51E-12	5.55E-11
FER1L5	0.014133175	0.049293223	1.802303689	7.93E-08	5.81E-07
ZNF738	0.222079642	0.486018863	1.129935159	6.59E-15	5.35E-13
PSG1	0.001743474	0.000837361	-1.058043079	3.68E-06	1.82E-05
CDCA7	0.570199915	1.659093895	1.540855808	5.25E-07	3.15E-06
OR52M1	0.00219658	0.000759089	-1.532917303	1.13E-12	2.77E-11
POU3F2	0.0297648	0.067051122	1.171654267	0.000496679	0.001410563
OPN5	0.001979002	0.000658401	-1.587734838	2.06E-09	2.17E-08
TEX28	0.000156615	7.69E-05	-1.026652402	3.52E-12	7.48E-11
GRM3	0.014061574	0.079345301	2.49638671	0.001708192	0.004198136
EYA1	0.027921732	0.096066235	1.782641019	0.000186939	0.000593281
DKK1	3.384973188	12.04774528	1.831546862	0.001111029	0.002854183
RHEX	0.68768724	1.82244393	1.406049946	0.001893127	0.004596912
SYT13	0.89812105	2.714819699	1.595874574	0.004419512	0.009675877
PTPRN	0.010846706	0.024704826	1.187535986	0.00034651	0.00102505
CYP8B1	96.74428726	44.96049928	-1.105518416	8.68E-11	1.27E-09
IL17RD	0.06962828	0.145342627	1.061712602	0.016978232	0.031290784
USP17L4	0.00011458	2.15E-05	-2.412133074	3.36E-14	1.75E-12
CKAP2L	0.624642798	1.281951848	1.037238748	2.90E-17	5.97E-15
OR14C36	0.000907573	0.000227497	-1.996168872	3.79E-13	1.12E-11
HUNK	0.332602867	0.871080428	1.389005325	0.000796368	0.002128064
MTRNR2L13	0.012400419	0.005790175	-1.098709933	0.000203622	0.000640429
AKR7A3	49.90431852	24.83468346	-1.006808308	5.31E-13	1.48E-11
OR1N2	0.204648024	0.05077904	-2.010839715	8.65E-08	6.27E-07
AC093423.3	0.001658471	0.000487079	-1.767625635	1.79E-12	4.16E-11
TUBB4A	2.28719507	4.588937615	1.004580779	0.000768286	0.002064107
BMP10	0.044458564	0.015792156	-1.493253182	7.67E-07	4.42E-06
C6	69.44552478	31.97737443	-1.118830239	5.23E-15	4.48E-13
CHST8	0.692955237	0.112585072	-2.621746618	0.006324348	0.013223118
TREM1	0.126334327	0.483023061	1.934845374	0.005206529	0.011161292
KIR3DL3	0.002522674	0.000682515	-1.88602022	9.89E-10	1.13E-08
DNASE1L3	7.542349769	2.921580378	-1.368265075	4.41E-13	1.26E-11
SAGE1	0.022970181	0.193800875	3.076740962	0.020679241	0.037086911
CLEC1B	0.283677107	0.055527872	-2.352965716	0.000584089	0.001628894
OR5AU1	0.011082111	0.000685982	-4.013918538	5.75E-13	1.57E-11
FSTL5	0.12877073	0.454806579	1.820448425	4.21E-05	0.000158254
MOGAT2	9.407946591	4.233978145	-1.151866047	4.05E-10	5.06E-09
CLSPN	0.225427856	0.478068539	1.084551667	7.83E-15	6.07E-13
MTRNR2L12	2.576975848	1.075243289	-1.261015889	3.26E-09	3.30E-08
OR5AR1	0.000109595	2.15E-05	-2.347953349	2.13E-14	1.31E-12
SAA2-SAA4	53.06636614	21.74119475	-1.287366536	4.48E-07	2.73E-06
SP8	0.072251619	0.197273576	1.449095897	0.011880476	0.022965843
AL355102.2	0.038359927	0.018457614	-1.055383875	3.01E-06	1.52E-05
PRC1	2.299227766	4.64877379	1.015700837	6.47E-18	1.96E-15
ZIC5	0.301721067	0.628170765	1.05794137	3.24E-05	0.000125386
ATP8A2	0.041507662	0.117939542	1.506597931	0.002804029	0.006495956
CTRC	0.038283681	0.012658687	-1.59660182	0.026150675	0.045545394
NXPE4	0.040002682	0.003771572	-3.406858723	0.003111776	0.007115794
SLC27A5	69.23477552	30.15776513	-1.198967342	2.25E-16	3.22E-14
IFI44L	1.6650131	0.700526992	-1.249020983	2.22E-05	9.03E-05
SLCO1B3	7.838501023	3.321141689	-1.238898517	0.001122742	0.00288044
KLHL38	0.05820357	0.131296329	1.17364703	1.05E-06	5.89E-06
GPRIN2	0.115091487	0.508181039	2.142561425	0.01666002	0.030755733
MAGEA1	3.628893255	7.291083485	1.006603601	0.005758393	0.012191934
LCAT	24.80327805	10.55472446	-1.232641886	5.93E-15	4.94E-13
STARD6	0.009302069	0.044901582	2.271142792	2.31E-05	9.32E-05
NCEH1	1.404661061	3.932754469	1.485318063	3.79E-07	2.36E-06
PCDHB2	0.235452516	0.475265624	1.013297916	0.025262875	0.044183533
SBK3	0.102089442	0.275996351	1.434815517	0.00934939	0.018657651
SLC28A3	0.088510185	0.239979422	1.438995327	0.023687289	0.041721222
NXF5	0.032728953	0.016224192	-1.012420845	3.90E-05	0.000147826
OR10V1	0.000721524	0.000171129	-2.075962848	3.51E-14	1.80E-12
HIST2H2AA3	0.054368651	0.016625707	-1.709359312	8.33E-06	3.76E-05
TRIM74	0.248879076	0.081073165	-1.618148584	1.98E-06	1.04E-05
PRAMEF17	0.030156703	0.013531541	-1.15615257	2.57E-06	1.32E-05
NCAPH	1.17016287	2.519472069	1.106412116	5.43E-17	9.63E-15
HDC	0.370135892	0.145038965	-1.351614503	6.68E-13	1.78E-11
ARHGAP28	0.077080729	0.166501737	1.111095111	4.35E-05	0.00016294
HBM	0.097561458	0.032654327	-1.579037137	1.38E-10	1.93E-09
C18orf54	0.157806745	0.340428724	1.109193902	3.01E-19	1.68E-16
KRTAP10-10	0.000834374	0.000360354	-1.211279729	1.38E-13	4.97E-12
CTSV	0.327684313	2.349035866	2.841690226	1.20E-09	1.34E-08
LRRC10	0.001142122	0.000129048	-3.14573563	4.78E-16	6.00E-14
DPEP2NB	0.005436209	0.00106511	-2.35159922	1.43E-11	2.51E-10
ZNF681	0.174162408	0.356855157	1.034905364	1.16E-09	1.30E-08
KIF18B	0.84219183	1.977578978	1.231514527	1.60E-17	3.87E-15
ZNF728	0.051093214	0.131417199	1.362950492	0.008682377	0.017469176
PLA2G4D	0.004416993	0.010112124	1.194949536	0.005426205	0.011566441
BANK1	0.080449862	0.184176221	1.19492496	0.025555892	0.044630218
MYADML2	0.01521664	0.033644066	1.144702202	2.36E-05	9.48E-05
PCLO	0.021581189	0.078205671	1.857498875	1.42E-05	6.07E-05
VWDE	0.023879375	0.074374709	1.639047052	0.000154842	0.000502583
SH3GL3	0.715387942	0.303826624	-1.235477505	0.013904931	0.026321755
KDM4F	0.002750214	0.000248436	-3.46859918	6.33E-12	1.26E-10
PRAMEF14	0.009458912	0.003415741	-1.469475594	2.97E-07	1.89E-06
SERPINB13	0.012964021	0.002994338	-2.114204105	4.26E-06	2.07E-05
GINS4	0.341672578	0.747985997	1.130396795	1.09E-15	1.13E-13
AKAIN1	0.169798221	0.047623545	-1.834074415	5.88E-08	4.46E-07
CARNS1	0.611630699	0.256888016	-1.251521231	0.000598183	0.001660315
CIDEA	0.73197163	0.359326923	-1.026490697	0.004009214	0.008877135
SERPINB3	0.692917904	0.070711613	-3.292665361	0.006447308	0.013460108
BOD1L2	0.000590897	0.000258757	-1.191309955	3.09E-11	5.01E-10
SEMA3E	0.118978201	0.418795626	1.815549106	2.37E-08	1.97E-07
LEUTX	0.007282071	0.001469707	-2.3088207	2.57E-11	4.24E-10
DLGAP5	1.092911362	2.331802231	1.093269033	1.03E-15	1.09E-13
CD1A	0.060588531	0.234636329	1.953309769	0.007202965	0.014826976
ZNF229	0.256044445	0.535514517	1.064531424	3.90E-05	0.000147826
KIF4A	1.558556727	3.604432778	1.209561578	1.61E-15	1.59E-13
OR4L1	0.000287688	0.000139568	-1.043537172	7.34E-13	1.93E-11
FAM178B	0.119786795	0.542393863	2.178871981	9.23E-06	4.11E-05
OR5P2	0.000130395	2.15E-05	-2.598664455	5.19E-15	4.48E-13
C3orf84	0.004835024	0.001505907	-1.6828907	3.75E-10	4.73E-09
UBE2C	7.750607263	18.1191644	1.225135169	3.28E-12	7.01E-11
OR5AP2	0.001024448	0.000255397	-2.004034168	1.87E-12	4.30E-11
ATP4B	0.01668268	0.007116436	-1.229124305	0.000214225	0.000669682
OR9G4	0.000102517	2.15E-05	-2.251638127	1.94E-14	1.22E-12
MYL3	0.807380044	0.288505363	-1.48464979	0.000558944	0.001567197
CCNB1	5.66010779	12.06276477	1.091659177	3.83E-16	5.14E-14
GJA3	0.017542203	0.052840538	1.590815239	0.002468858	0.005821688
CLC	0.172833102	0.044743171	-1.949640155	0.000568395	0.001590226
GSC2	0.004920817	0.002401806	-1.034777999	2.39E-12	5.32E-11
CLDN4	5.558365025	13.15436499	1.242809119	0.000717439	0.001946831
PIFO	0.039701162	0.169003467	2.0897997	3.23E-11	5.22E-10
FAM163B	0.792754315	0.354618784	-1.160604866	2.21E-05	8.96E-05
SCIN	0.043495976	0.109652745	1.333988084	0.000243433	0.000748547
ABCA8	3.092512722	1.376519243	-1.167754752	1.76E-13	6.06E-12
OR13C2	0.000546195	0.000103544	-2.399170828	1.57E-14	1.04E-12
GPR149	0.003529822	0.000175001	-4.334156623	9.63E-14	3.72E-12
HILPDA	1.954016084	4.2873242	1.133635173	1.65E-10	2.27E-09
CYP4F8	0.009839105	0.004330869	-1.183870426	0.020596618	0.036948387
TPSB2	2.359902377	1.114248254	-1.08265648	0.009458041	0.018850087
CHRNA1	0.033905714	0.573091428	4.079164964	0.021093019	0.037689942
RIDA	215.6646269	105.7273981	-1.028440282	3.28E-20	2.84E-17
EVA1C	2.01687605	0.825058299	-1.289554455	4.07E-13	1.19E-11
MAGEB5	0.000407162	9.71E-05	-2.067525034	5.49E-15	4.65E-13
TMPRSS11D	0.030959299	0.006100909	-2.34327659	0.005791436	0.012253375
SPATA46	0.334056241	0.100974089	-1.726105877	0.002627282	0.00614084
OR5T2	0.000525363	3.69E-05	-3.833029295	1.58E-13	5.52E-12
GABRA3	0.07795806	0.376891279	2.273378327	5.54E-08	4.22E-07
MISP	1.516395361	4.042567962	1.41462608	0.003573714	0.008031619
MBD3L5	0.00017233	2.15E-05	-3.000946157	2.77E-14	1.54E-12
TUBB3	0.04258324	0.107566121	1.336866122	0.000799229	0.002134598
SALL4	0.289901654	0.583455697	1.00905955	4.31E-05	0.000161673
OR13C5	0.011120998	0.004700858	-1.242290383	1.05E-11	1.93E-10
KRTAP4-11	0.000466295	7.17E-05	-2.701453549	7.94E-15	6.12E-13
OR4K14	0.000652137	0.000204301	-1.674476821	4.47E-13	1.28E-11
PFN2	2.407271228	6.4713811	1.42667494	2.74E-05	0.000108177
GTSE1	0.792269248	1.763511705	1.15438844	8.69E-17	1.40E-14
PHEX	0.076024734	0.218848438	1.525391316	0.000166342	0.000535292
DEFB121	0.000573394	2.15E-05	-4.73530137	4.88E-14	2.21E-12
HOXC13	0.041934104	0.102663329	1.291725021	0.025553811	0.044630218
NEK2	1.781619832	3.641719241	1.031430179	8.34E-16	9.36E-14
MBD3L1	0.002767172	0.001342699	-1.04327624	7.60E-13	1.98E-11
NETO1	0.016588571	0.0071248	-1.219268085	5.26E-06	2.50E-05
CCNJL	0.137673376	0.4626398	1.748639798	0.001063399	0.002744164
OR10A4	0.001057725	0.000494341	-1.097387793	5.51E-11	8.42E-10
AC048338.1	0.001879535	0.000903211	-1.057240565	2.85E-06	1.45E-05
FAM19A5	3.571958322	1.140298383	-1.647303862	0.011780895	0.022781911
LHX3	0.490201854	0.215059588	-1.188639486	4.73E-08	3.65E-07
LAPTM4B	26.56430465	53.85753977	1.019659379	2.31E-11	3.87E-10
B3GALT5	0.034854657	0.106780479	1.615224571	0.021852483	0.038862297
METTL11B	0.024138818	0.053536526	1.149168506	0.010637476	0.020852076
RAB42	0.441137383	0.925839076	1.069533432	5.16E-07	3.11E-06
ZBTB12	1.154176248	2.349145581	1.025272576	1.31E-19	8.78E-17
GRIFIN	0.008383727	0.003955763	-1.083635786	3.65E-07	2.28E-06
CD5L	6.983245484	2.96475879	-1.235982956	6.17E-07	3.65E-06
TG	0.19313463	0.094847296	-1.025928319	1.94E-07	1.29E-06
UPP2	5.581778211	2.26556309	-1.300855134	2.07E-10	2.77E-09
ASB10	0.003670328	0.001106108	-1.73041643	9.12E-11	1.33E-09
A4GNT	0.102027747	0.337761341	1.727042656	1.84E-05	7.65E-05
CALCR	0.017723815	0.117988465	2.734884749	7.49E-06	3.42E-05
MCM2	4.374397816	9.995844799	1.192244074	1.08E-19	7.58E-17
SFTPA2	0.075041956	0.031435265	-1.255313516	0.022926192	0.040566967
SLCO1B7	0.07419604	0.035383146	-1.068279857	0.000844513	0.002242729
CA5A	3.192731365	1.486917087	-1.102466968	3.93E-16	5.18E-14
ELOVL4	0.070936654	0.276282022	1.961538503	0.000400746	0.001167348
TFF2	0.894875633	9.689075273	3.436599881	0.002113755	0.005068805
CCDC74B	0.027614881	0.082671904	1.581951199	0.000111303	0.00037623
CYP26B1	0.317217494	0.908136139	1.517436253	0.00773329	0.015783811
PCK1	137.034996	62.5317495	-1.131883589	7.54E-16	8.74E-14
MS4A18	0.003198762	0.000985536	-1.698533998	2.32E-09	2.41E-08
CYP3A43	2.2618746	0.888692669	-1.347762455	1.68E-09	1.80E-08
PLEKHH2	0.12307667	0.276025431	1.165243881	5.89E-06	2.76E-05
OR7G1	0.000417613	2.15E-05	-4.277941626	1.95E-14	1.22E-12
METTL24	0.157935935	0.327885168	1.053851182	0.0003452	0.001022541
AL020996.2	0.000374705	0.000156229	-1.26208968	1.73E-13	5.98E-12
CACNG4	0.971973423	2.353263513	1.275674108	0.00058519	0.001631002
KDM8	6.271743665	3.118919729	-1.007820173	3.70E-13	1.10E-11
EGLN3	0.765506121	2.193257928	1.518589666	1.18E-05	5.13E-05
STK32A	0.016422393	0.040555042	1.304216919	0.003114628	0.007120222
PAPLN	1.182096909	2.683225417	1.182619947	0.000123922	0.00041336
SLC5A8	0.007471385	0.003717766	-1.006939688	0.004020348	0.008897954
OR4A15	0.000139411	4.17E-05	-1.739925546	8.63E-14	3.39E-12
LUZP2	0.201166836	0.066756213	-1.591418466	0.00015484	0.000502583
GPR139	0.000580008	0.00020052	-1.532328232	3.84E-12	8.03E-11
WSCD2	0.051360963	0.011457272	-2.164408688	0.000295767	0.000891572
IBSP	0.155044024	1.248792043	3.009783423	2.38E-06	1.23E-05
MMP1	0.49822495	3.927106912	2.978597698	0.000242492	0.000746248
CALCA	4.350566143	0.850510757	-2.354801764	0.000584116	0.001628894
IGDCC4	0.098021152	0.245620737	1.325267358	0.00612732	0.012866955
GADD45G	64.47541581	29.80933871	-1.112984801	1.11E-15	1.15E-13
KIF18A	0.358251277	0.809458275	1.175984871	2.63E-17	5.64E-15
CDCA8	2.254204954	4.889117316	1.116955332	6.37E-17	1.10E-14
OPN1LW	0.002055801	0.000697536	-1.559360481	2.18E-13	7.13E-12
MYBPC2	0.019881757	0.11493939	2.531356152	0.000750523	0.00202344
TERB2	0.416229791	0.150724101	-1.465470108	2.08E-06	1.09E-05
CLEC5A	0.077729885	0.194658496	1.324404023	6.59E-08	4.92E-07
RPL10L	0.275765256	0.576238798	1.0632261	0.022052759	0.039186839
CHRNA4	2.259234664	0.840147795	-1.427119081	1.22E-08	1.08E-07
C1GALT1C1L	0.093211271	0.246094888	1.400638377	0.004042382	0.008942871
ZNF578	0.014988151	0.032948806	1.136403723	0.005819941	0.0123002
FAM24B	0.297240198	0.740666161	1.317194189	2.56E-11	4.23E-10
NSUN7	0.135702637	0.291366514	1.102386327	0.020356593	0.036577364
SLC14A1	0.403671412	0.187430395	-1.106826487	2.21E-05	8.98E-05
FAM25C	0.002807996	0.001270711	-1.14390483	2.84E-12	6.17E-11
IL4I1	1.01893927	2.573664195	1.336755759	6.48E-05	0.000231466
SYT9	0.486982484	0.140792215	-1.790302315	0.00014789	0.000482967
MSC	4.222976134	13.46882101	1.673291572	0.017868764	0.032697609
PTPRQ	0.012283692	0.034754512	1.500455991	0.002840669	0.006566068
APOC4	1.178889533	0.568108015	-1.053191376	7.15E-14	2.99E-12
IFNA16	0.000172301	2.15E-05	-3.000705783	3.28E-14	1.72E-12
TMSB10	824.9783365	1840.625961	1.157768342	3.50E-08	2.80E-07
OR5D14	0.000160434	2.15E-05	-2.897757221	2.77E-14	1.54E-12
OR13C8	0.000286096	0.000110671	-1.370225679	6.97E-14	2.94E-12
SEC14L3	0.500666539	0.234545208	-1.093984018	1.49E-11	2.60E-10
TSSK1B	0.00032526	0.000155679	-1.06302325	8.80E-13	2.24E-11
GH2	0.038303337	0.010216822	-1.906523524	2.64E-05	0.000104838
ZP2	0.007519878	0.001332651	-2.496410416	2.82E-07	1.81E-06
FBN2	0.02127288	0.04359776	1.035238636	0.008886987	0.017841121
MSLNL	0.01241491	0.005248729	-1.24203391	6.61E-05	0.00023564
KRTAP4-5	0.000850849	2.15E-05	-5.30467645	1.84E-14	1.17E-12
OR4A47	0.030945951	0.000453092	-6.093801891	1.00E-13	3.83E-12
ZNF492	0.027103438	0.083239797	1.618797582	8.16E-07	4.68E-06
SPINK13	0.028531668	0.071859379	1.332612377	0.010119359	0.019971977
CLEC4M	0.310150548	0.046956527	-2.72357106	0.004250153	0.009348002
UPK1A	0.188813847	0.639385489	1.759721431	0.019747061	0.035606605
LRP12	0.316260713	0.642130678	1.021752576	1.83E-08	1.57E-07
CLDN5	9.50239102	4.503572929	-1.07722055	4.53E-08	3.51E-07
NKX6-2	0.024977745	0.005374638	-2.216403673	0.013223078	0.025198018
OR2L5	0.000636169	2.15E-05	-4.885183544	7.70E-15	5.99E-13
CYP11B1	0.007814897	0.001583939	-2.302710425	0.000112306	0.000378872
TNNT1	0.330586954	1.095984684	1.729125939	4.46E-05	0.00016685
ENPP5	0.465517906	1.012981376	1.121699084	0.00392338	0.008717115
IDO2	0.554820193	0.221059961	-1.327582555	7.46E-06	3.40E-05
PROK1	2.137639979	0.235868414	-3.179964756	0.02362583	0.041622994
ATP2B3	0.020872238	0.007097779	-1.556145836	0.017725195	0.032466158
NNMT	178.9352195	78.83861222	-1.182463092	4.43E-07	2.70E-06
DAZ1	0.000114382	5.70E-05	-1.005922685	2.23E-12	4.98E-11
C9	116.493461	55.93172772	-1.058510175	0.000760026	0.002044442
ECT2	1.494499299	3.431562429	1.199203381	7.49E-24	3.85E-20
EVPL	0.338614573	0.801246273	1.242601678	3.74E-05	0.000142815
CLEC20A	0.00132107	0.000641953	-1.041166395	1.24E-11	2.22E-10
CENPI	0.336895367	0.676819086	1.006469662	3.65E-15	3.29E-13
TRIM17	0.133120113	0.28452602	1.095832026	6.13E-07	3.63E-06
AL355987.1	0.000203313	3.46E-05	-2.556738119	1.54E-13	5.42E-12
SPAG6	0.02368619	0.048196996	1.024897111	0.028007917	0.048353942
EDN3	0.071387073	0.03354873	-1.089404667	0.002452267	0.005790535
TP53TG3D	0.005212188	0.015962108	1.614690162	0.017023272	0.031356464
OR10K2	0.000245029	8.94E-05	-1.455051398	3.13E-14	1.66E-12
MCOLN3	0.129937972	0.521694598	2.0053824	3.78E-06	1.86E-05
UGT1A7	0.129695314	0.274207266	1.080140446	0.012031975	0.0232183
OR51V1	0.000137379	2.15E-05	-2.673938675	2.18E-14	1.31E-12
ZNF486	0.205746062	0.513230369	1.318741725	2.58E-06	1.32E-05
OR10A5	0.000302126	0.000120719	-1.323497276	4.40E-14	2.14E-12
VTCN1	1.794155227	3.687461575	1.039323301	0.005492952	0.011697264
PNCK	0.273138095	1.550016009	2.504580666	1.98E-06	1.04E-05
GPT	54.81535319	22.66285563	-1.274250374	2.90E-21	4.97E-18
LYPD6B	0.168426721	0.595217847	1.821296742	8.36E-06	3.76E-05
SMR3B	0.14468705	0.056045369	-1.368268738	4.52E-09	4.41E-08
ZNF804A	0.045345016	0.093784253	1.048401719	0.000436012	0.001258664
KIF2C	1.779646263	3.963876281	1.155321427	3.80E-14	1.92E-12
GALNTL6	0.141891026	0.012023599	-3.560842666	1.43E-06	7.77E-06
OR2T27	0.000113653	2.15E-05	-2.400403211	2.04E-14	1.27E-12
GSTZ1	6.27940113	3.085158988	-1.025282137	1.19E-11	2.15E-10
COX7B2	4.439776817	9.58615379	1.11046493	0.011324148	0.022023032
MAGEB2	0.699739083	3.64896979	2.382600227	0.007940857	0.016141247
NUTM2F	0.028550477	0.013560029	-1.074154616	1.56E-06	8.39E-06
AP3B2	0.017919203	0.039806971	1.151514601	0.01285053	0.024603596
MEP1A	1.452315242	5.48951708	1.918324597	1.47E-07	1.01E-06
XRCC2	0.341436996	0.702361186	1.040593733	4.04E-18	1.32E-15
CLCA1	0.09155761	0.01171478	-2.966349956	2.86E-10	3.68E-09
KIF15	0.411289035	1.006266634	1.290788117	7.34E-19	3.44E-16
PFKFB4	0.468242983	0.995613353	1.088328204	7.86E-09	7.26E-08
TMEM215	0.001618389	0.000615879	-1.393840528	7.07E-10	8.37E-09
SYT6	0.014547068	0.034057871	1.227259833	0.000129283	0.000428739
CDC6	1.748586967	3.672517745	1.07057991	1.41E-14	9.55E-13
CFAP46	0.092433853	0.042355097	-1.125885738	0.001455563	0.003633372
MT1B	72.93220703	34.53275557	-1.078590593	0.025121528	0.043976218
TTC36	19.83166105	6.188818536	-1.680069593	2.44E-14	1.43E-12
GPR84	0.092882905	0.232314625	1.322594986	6.18E-05	0.000222373
CREG2	0.024570414	0.052434427	1.093592177	8.66E-08	6.27E-07
KRT86	0.796776287	0.378082321	-1.075474321	0.000327303	0.000973265
CD109	0.960548524	1.988606608	1.049827505	3.63E-07	2.27E-06
MRC1	7.604857283	3.265122333	-1.219784128	0.000436831	0.001260558
SIX2	0.259490309	0.820219704	1.660329739	0.009637025	0.019152361
SHCBP1	0.558657264	1.290460417	1.207850524	2.16E-14	1.31E-12
AL807752.6	0.001287654	0.000450638	-1.514703064	9.36E-14	3.64E-12
TUBA3C	0.286733192	4.884228133	4.090349764	0.009108446	0.018227279
PCSK1	4.741630975	0.057623531	-6.362581502	0.010790827	0.021116293
NKAIN2	0.160595617	0.355579887	1.1467412	0.009636985	0.019152361
ZNF711	0.211959238	0.560278194	1.402356501	1.43E-09	1.56E-08
HGFAC	40.54170299	14.59239446	-1.474190058	5.55E-12	1.11E-10
CYP2B6	38.86371577	19.38627125	-1.003388501	2.80E-06	1.42E-05
GPT2	40.06981352	18.88942575	-1.084936952	6.92E-16	8.15E-14
PSG8	0.006926722	0.002940849	-1.23593995	1.90E-06	1.00E-05
GAP43	0.077534153	0.178434288	1.202489018	0.000782209	0.002094219
DLL3	0.014627745	0.106837181	2.86863449	0.004573304	0.009978588
AC074143.1	0.000730452	0.000296793	-1.299329297	5.42E-13	1.50E-11
AWAT2	0.018393123	0.004713858	-1.964186198	0.000365868	0.001077759
TPBG	0.262468793	0.547958164	1.06191985	0.003315701	0.007515264
CD177	0.081969557	0.706634782	3.107804651	6.19E-05	0.000222787
ODF4	0.003130794	0.001356689	-1.206438044	4.65E-11	7.23E-10
CFC1B	0.000120615	2.17E-05	-2.475412164	6.78E-14	2.87E-12
ZNF730	0.023929082	0.065520047	1.453171312	7.55E-06	3.44E-05
ADORA2B	0.273106421	0.565225056	1.049362189	1.08E-08	9.71E-08
KRT80	0.825286136	1.686123928	1.030744267	3.82E-05	0.000145492
MFAP2	0.559125508	1.421814236	1.346488916	0.00192514	0.00466217
C10orf99	0.096562159	0.033818173	-1.513659215	1.54E-07	1.06E-06
TRIM64B	0.00039671	2.52E-05	-3.977914438	2.65E-14	1.51E-12
OR9K2	0.000186151	2.15E-05	-3.112247202	9.81E-15	7.24E-13
DUSP9	5.216075629	16.1030582	1.62629801	0.015974359	0.029631812
DSC3	0.02584771	0.117760433	2.187746485	0.014777814	0.0277392
SDS	228.527352	87.73066958	-1.381213664	1.24E-10	1.76E-09
MEX3A	0.650916573	1.59373889	1.291870733	6.49E-12	1.28E-10
LRP8	0.096574689	0.231450724	1.260988052	0.006826886	0.014152943
PFN3	0.068840398	0.029068604	-1.243793668	1.38E-06	7.54E-06
SLC14A2	0.250706983	0.057145609	-2.133287639	3.77E-05	0.000143872
KHDC1	0.036578631	0.102575158	1.487608377	0.001912259	0.0046368
OR4M1	0.000645419	0.000132282	-2.286617387	1.98E-12	4.52E-11
CPLX3	8.45E-05	2.15E-05	-1.972360573	2.17E-14	1.31E-12
HIST2H3C	0.039449703	0.018308273	-1.107518715	0.000320699	0.000956024
C8orf34	0.003226406	0.007967474	1.304194252	0.013830039	0.026192844
LKAAEAR1	0.161731134	0.062953881	-1.361230214	0.001930898	0.004674646
MTRNR2L5	0.010914628	0.005349885	-1.02868314	6.11E-08	4.60E-07
TFAP2A	0.162127862	0.351368448	1.115852606	0.001659728	0.004092669
GLB1L3	0.024669551	0.075947251	1.622266289	0.020010008	0.036030161
KIF23	0.60914246	1.494972454	1.295267327	1.72E-20	2.04E-17
MIXL1	0.040189963	0.08610977	1.099341666	0.005119099	0.010993732
IGFL1	0.296917009	0.077292777	-1.941654239	0.001311397	0.003307225
NT5DC2	3.337133202	8.327396183	1.31925619	4.07E-10	5.09E-09
KIF3C	0.413790908	0.910091985	1.137110421	7.91E-08	5.80E-07
SPINK8	0.115478806	0.005323382	-4.439141207	6.34E-10	7.63E-09
BUB1	0.844691444	1.897367216	1.167502582	8.19E-20	6.01E-17
MELK	1.485920621	3.164458502	1.090601601	2.39E-16	3.35E-14
OR2L3	0.000380769	0.00014697	-1.373396819	1.72E-13	5.95E-12
LRRC53	0.00075863	0.000211553	-1.842379997	4.20E-11	6.59E-10
BTNL9	2.111257012	1.028753825	-1.037204419	4.42E-16	5.59E-14
AASS	5.708562054	2.802461897	-1.026432629	2.28E-08	1.90E-07
PLEKHS1	0.044007167	0.430945799	3.29169604	3.25E-05	0.000125898
ANXA10	11.56073414	5.76239852	-1.004491672	5.21E-11	8.01E-10
BIRC5	4.19170317	8.805149156	1.070810885	2.13E-13	7.03E-12
MEI4	0.116223741	0.236290137	1.023654609	0.004630517	0.010077773
HMGA2	0.051591639	0.376294149	2.86665167	0.004158184	0.009167501
WNK2	0.667566483	1.6839419	1.334858935	3.78E-06	1.86E-05
CADM2	0.03044611	0.094158777	1.628837681	1.65E-08	1.42E-07
HPDL	0.173738127	0.492924916	1.504453519	4.69E-06	2.25E-05
MIP	0.161112115	0.08009536	-1.008274404	9.16E-15	6.91E-13
CUZD1	0.080864475	0.863935236	3.417345221	9.33E-08	6.69E-07
CA4	0.880462333	0.436843604	-1.011144417	0.000199483	0.000628565
SERPINB12	0.005088614	0.000417462	-3.607554218	1.27E-12	3.05E-11
RNASE12	0.001488516	0.000671233	-1.148988462	3.48E-13	1.05E-11
CCT8L2	0.000428593	9.66E-05	-2.148771657	2.06E-13	6.80E-12
PPP1R32	1.207199738	0.594779419	-1.021237766	5.55E-20	4.28E-17
HMGA1	24.56252377	51.88803104	1.078942989	2.31E-17	5.16E-15
DLX5	0.110020121	0.39847166	1.856709725	0.028364036	0.048892142
GALNT15	0.952916387	0.425060893	-1.164680099	2.93E-14	1.59E-12
KRTAP10-7	0.001193921	0.00029205	-2.031421031	2.19E-13	7.13E-12
GALR3	0.456512877	0.219225574	-1.058239448	6.28E-05	0.000225295
OR3A3	0.010301966	0.003039663	-1.760936591	2.04E-09	2.15E-08
OPALIN	0.002249586	0.000591074	-1.92824937	5.88E-07	3.50E-06
OR5K1	0.000476863	0.000170629	-1.482714261	6.29E-13	1.70E-11
ERVMER34-1	0.170148037	0.483336909	1.506238659	6.32E-06	2.93E-05
OR52A5	0.000364748	7.86E-05	-2.215174476	7.77E-14	3.18E-12
FAM167A	0.65439088	0.246456281	-1.408820897	0.000772434	0.002073448
KMO	5.079237409	2.391581275	-1.086647088	1.17E-12	2.84E-11
ENPP6	0.150811868	0.366892649	1.282608032	0.028043372	0.048404317
PDIA2	0.974472054	2.264735028	1.216649548	0.000367464	0.001081223
TGFBR3L	2.319944926	1.071680525	-1.114215664	2.37E-10	3.10E-09
CCDC196	0.701038226	0.231974391	-1.595527564	1.24E-09	1.37E-08
LRCOL1	4.497041402	2.159416868	-1.058334388	1.34E-09	1.47E-08
SPIB	0.141243548	1.583847455	3.487176518	0.002124341	0.005091815
PACSIN1	0.356858939	0.737987231	1.048241942	0.000254037	0.000777587
VPREB1	0.009929135	0.003094401	-1.682007849	1.36E-11	2.39E-10
ARMC3	0.004422332	0.015658953	1.824108536	0.00101052	0.002621782
CXCL6	2.365983452	6.825126619	1.528415828	0.027760976	0.047997454
MGAM2	0.051505991	0.440150209	3.095183806	5.21E-05	0.00019098
MOS	0.079332981	0.000821734	-6.593105083	3.40E-13	1.03E-11
GNAO1	1.23605688	0.594198522	-1.056728211	0.000105138	0.000357821
OR5I1	0.00023608	2.15E-05	-3.455049536	3.88E-14	1.95E-12
OR4K13	0.000451133	2.15E-05	-4.389327529	4.77E-14	2.21E-12
FRMD5	0.008332605	0.032510141	1.964050316	2.97E-05	0.000116122
ZNF257	0.110780485	0.225624179	1.026217922	3.39E-06	1.69E-05
OR4F4	0.001163641	2.15E-05	-5.756347745	3.33E-14	1.74E-12
TSC22D3	28.07775955	13.10590094	-1.099211289	4.92E-13	1.38E-11
SEMA6A	1.015051039	2.240865327	1.142503676	0.01845205	0.033609402
SLC12A1	0.457155049	0.140516371	-1.701945329	5.34E-06	2.53E-05
SELE	0.857835888	0.402999252	-1.089924513	0.000806424	0.002150836
STEAP1B	0.053688772	0.230409765	2.101509543	7.79E-06	3.53E-05
VIPR1	0.621495073	0.282746521	-1.136233681	2.18E-07	1.44E-06
FGF4	0.190826923	0.078967793	-1.272928451	0.009894616	0.019593601
FBLN1	4.441476415	10.20611031	1.200321904	0.017255231	0.031710317
CEP126	0.050011498	0.116534594	1.220426566	2.04E-12	4.64E-11
CELA2A	0.026130364	0.009010408	-1.536062943	0.000437401	0.001261504
COL6A5	0.005269214	0.002277079	-1.210403384	2.52E-06	1.29E-05
KIF5A	0.026134325	0.052636605	1.010120538	1.81E-06	9.59E-06
SLC1A2	7.965280289	3.298710091	-1.271823138	3.63E-11	5.80E-10
CABP2	0.005588052	0.001577529	-1.824679019	1.38E-14	9.45E-13
SMIM28	0.013718674	0.006654908	-1.043650391	2.10E-08	1.78E-07
