# Supplementary material for: Development and Validation of a Novel Mitophagy-Related Gene Prognostic Signature for Hepatocellular Carcinoma Based on Immunoscore Classification of Tumor
Source: Hindawi journal article supplement (doi:10.1155/2021/5070099), 2021-10-25
Supplement: f1 [file 5070099.f1.zip › 5070099.f1/Table S5.txt]

gene	group1mea	group2mea	logFC	p	FDR
ABO	0.648504756	0.153863922	-2.075462169	5.54E-06	8.16E-05
ACADL	7.246388993	3.141924308	-1.205613828	1.89E-10	2.72E-08
ACAN	0.138632268	0.975852437	2.815399906	3.19E-05	0.000333134
ACRV1	0.08174657	0.193758756	1.24503141	2.14E-07	6.44E-06
ACTL8	0.213951851	1.376328836	2.685467135	0.002424915	0.010072533
ACY3	13.69046008	6.838958925	-1.001322301	5.03E-09	3.19E-07
ADCY1	2.208435477	0.770613059	-1.518946142	0.000657195	0.003596315
ADH1C	444.1331192	196.7615362	-1.174543934	1.37E-10	2.10E-08
ADRA1D	0.067327918	0.151035796	1.165613751	0.003238967	0.012687262
AKR1D1	26.29240842	12.60208255	-1.060984136	3.28E-06	5.40E-05
AKR7A3	54.32657174	25.19171237	-1.108708819	2.91E-09	2.04E-07
AKR7L	16.06452595	6.460110871	-1.314247579	3.81E-10	4.43E-08
ALDH1A2	1.970239402	0.880305707	-1.162294415	0.013355929	0.037837896
ALOXE3	0.033932853	0.102315214	1.592266067	0.009266483	0.02856149
ANKRD1	1.799210967	9.721241387	2.433776196	0.006081289	0.020642393
ANKRD24	3.629108609	1.634601371	-1.150676383	1.15E-06	2.34E-05
ANLN	2.176685186	4.601551921	1.079987741	1.21E-11	3.67E-09
AOX2P	1.084200139	0.515243079	-1.07330597	0.000186038	0.001351896
APOF	38.05849219	15.64964663	-1.282088324	2.71E-07	7.62E-06
AQP10	0.110130588	0.492046156	2.159578424	0.002849837	0.01148137
AQP8	2.035757584	0.90243799	-1.17366607	0.017545801	0.046594586
ARID3A	1.494194409	3.375538607	1.175749851	4.32E-07	1.09E-05
ARSF	1.549673847	0.631833141	-1.294349093	0.012331858	0.035579359
ART5	0.100670809	0.524792942	2.38210291	0.000119517	0.000959108
ASF1B	2.48618517	5.031663434	1.017101672	9.73E-10	8.78E-08
ASPDH	31.97105201	14.49869853	-1.140842814	1.75E-08	8.56E-07
ASPG	11.46348014	4.734885183	-1.275643744	6.76E-05	0.0006122
ATHL1	35.79514882	15.894114	-1.17127148	0.000475025	0.002805688
ATOH7	0.512216294	0.243154515	-1.074879768	0.000551603	0.003154886
ATP6V0A4	0.039919976	0.084637535	1.084186744	0.0007826	0.004129259
ATP6V0D2	0.508315167	1.325793519	1.383060921	3.87E-08	1.62E-06
AURKB	3.048210839	6.89176393	1.17691059	2.09E-11	5.10E-09
B3GNT8	0.343397798	0.759274993	1.144741705	0.001916101	0.008340814
BAALC	2.180086235	1.012882003	-1.105919088	0.006030822	0.020518514
BAGE	0.344001978	1.272970436	1.887710149	0.007459827	0.024193143
BBOX1	8.610617852	4.247833788	-1.019389445	7.91E-05	0.000695551
BCAT1	0.77772224	1.764662413	1.182065317	1.64E-07	5.17E-06
BCO2	7.890897247	2.744756769	-1.523511045	3.09E-10	3.86E-08
BIRC5	3.40732023	8.72444639	1.356426046	6.07E-13	4.27E-10
BIRC7	0.315871956	0.723806635	1.196264476	0.008481187	0.026691039
BTNL3	1.442381279	0.486316299	-1.568485728	0.001655371	0.007444562
BUB1B	1.729680293	3.547926638	1.036470778	1.19E-11	3.67E-09
C11orf85	0.407164107	0.167842033	-1.278506332	0.009034355	0.027995584
C12orf56	0.299287412	0.964594661	1.688391225	0.000129769	0.001017635
C13orf29	0.285332053	0.74152203	1.377847731	5.81E-07	1.38E-05
C13orf38-SOHLH2	0.459222602	1.480833635	1.689144014	0.000866428	0.004488865
C15orf27	0.32214933	0.679821325	1.077426023	1.73E-05	0.000205956
C15orf42	0.459414932	0.922727825	1.006107415	4.24E-09	2.82E-07
C15orf43	0.636051279	0.210884927	-1.592687098	5.09E-06	7.63E-05
C16orf59	1.377950859	2.779367293	1.01223206	2.17E-10	2.94E-08
C17orf99	0.034994127	0.105988074	1.598717235	5.06E-05	0.000485281
C1orf64	0.663159255	1.597774549	1.268636579	0.016452205	0.044376177
C21orf15	0.582971927	0.186209866	-1.646496899	0.002956517	0.011801231
C3P1	74.33112391	22.96228061	-1.694700485	5.04E-10	5.54E-08
C5orf27	34.90053814	7.929768146	-2.137898692	1.11E-06	2.27E-05
C5orf46	1.334056763	2.689737717	1.011645446	0.000985447	0.004957135
C5orf58	1.6074666	3.861728351	1.264457922	0.007757091	0.024882457
C6orf105	1.831355386	0.713997352	-1.358921154	0.000265459	0.001783048
C9orf68	2.548314642	1.265857487	-1.009428427	8.86E-11	1.52E-08
CA9	2.258326802	12.06903948	2.417984684	0.008794696	0.027437142
CACNG4	0.39566752	1.109450102	1.487484238	0.006745423	0.022402458
CALCR	0.095126405	0.265277608	1.479585137	0.000438077	0.002630743
CAMK2B	1.119057901	0.41179672	-1.44228044	0.001278901	0.006074585
CAPZA3	0.491653425	0.235875414	-1.059616643	1.61E-05	0.00019399
CATSPER1	0.201305563	0.499825767	1.312038235	0.000806911	0.004235745
CBLN3	2.90562682	1.09250177	-1.411213807	0.00052082	0.003019858
CBX2	0.809077253	1.665074899	1.041237708	1.43E-05	0.000175391
CCDC38	0.692613436	0.311133747	-1.154515489	3.40E-06	5.55E-05
CCNB2	3.470719637	7.300273395	1.072715664	2.10E-10	2.88E-08
CD177	0.110971994	0.489200278	2.140229594	0.005466784	0.018920975
CD5L	11.69079876	4.861372006	-1.265938062	0.002460914	0.010198613
CDC20	4.912302039	11.18090209	1.186565416	1.55E-11	4.42E-09
CDC20B	0.174229356	1.675845349	3.265829387	0.000749981	0.003988105
CDC25A	0.709904543	1.501030078	1.080255935	8.00E-11	1.43E-08
CDC6	2.345273078	5.150518406	1.134961732	2.99E-12	1.47E-09
CDCA2	0.522592107	1.1458877	1.132708424	1.32E-11	3.88E-09
CDCA5	2.49390303	5.435922187	1.124119434	1.13E-13	1.53E-10
CDH9	0.141680997	0.452261554	1.674511092	0.005819551	0.019917167
CDKN3	6.796603897	13.77860329	1.019543702	4.91E-11	1.04E-08
CDT1	1.668970159	3.778452281	1.178837243	5.69E-11	1.16E-08
CDX2	0.088954931	0.584267509	2.715482585	0.001310607	0.006195944
CENPA	1.30377337	3.067079798	1.23417259	3.85E-13	3.11E-10
CENPM	3.046476569	6.453255722	1.082885552	1.48E-09	1.17E-07
CFHR3	86.23811153	36.04584526	-1.258492606	7.22E-10	7.29E-08
CFHR4	25.65490525	12.42689822	-1.045768455	4.76E-09	3.05E-07
CFTR	5.096395161	1.831534558	-1.476424222	0.014391461	0.040179686
CHRNA2	0.014558658	0.035503416	1.286080463	0.0010966	0.005383109
CHRNA3	0.09397159	0.227226796	1.273836419	0.005544799	0.01912269
CHRNA4	7.43336977	1.315710854	-2.498173905	2.79E-05	0.00030005
CIB2	0.95750758	2.163181924	1.175799189	1.36E-06	2.67E-05
CKAP2L	0.866593406	1.828669716	1.077367363	2.12E-11	5.10E-09
CKMT1A	0.305419622	0.76746971	1.32931706	0.004464034	0.016186757
CLDN18	7.463726444	18.74371975	1.328439274	0.000278404	0.001849998
CLEC2L	0.187082742	1.424050746	2.928252175	5.18E-08	2.04E-06
CLEC4G	4.065523145	1.312812272	-1.630780377	0.008829595	0.027502578
CLEC4M	3.511081669	0.999571031	-1.812534558	0.000419625	0.002538942
CLEC5A	0.373091322	0.802161875	1.104364596	0.001751607	0.007767092
CLLU1OS	0.109605472	0.330326134	1.591571287	0.014076919	0.039465211
CLRN3	9.652604885	3.369540777	-1.518366341	1.85E-05	0.00021634
CLSPN	0.356677574	0.739666398	1.05225423	6.82E-10	6.97E-08
CNDP1	3.62867837	1.03122614	-1.815083449	2.10E-05	0.000242028
CNFN	0.629166681	2.056779928	1.70887326	1.92E-05	0.000223271
CNGB3	0.016947182	0.089360758	2.39859603	1.11E-05	0.000142914
CNTN3	0.660387042	0.31337822	-1.075406896	0.004928151	0.017473518
COL2A1	2.097786206	4.756888026	1.181150411	0.000844181	0.004387679
COL4A3	0.839323888	0.301362381	-1.477728306	6.70E-06	9.47E-05
COL6A4P1	0.059223805	0.138033438	1.220768709	3.24E-07	8.70E-06
COLEC12	0.719983187	1.972992762	1.454350542	1.10E-06	2.26E-05
COX8C	0.090533624	0.706933374	2.965048639	0.001951177	0.008473511
CPNE4	0.030479239	0.075389665	1.306539879	0.001046708	0.005193035
CPS1-IT1	2.56519546	1.015327948	-1.337122971	0.001281299	0.006084099
CRHBP	6.225296815	2.563215958	-1.28018759	2.93E-05	0.000312093
CRX	0.058046895	0.017778265	-1.707104391	0.00146539	0.006747112
CSTB	138.4830141	280.8175303	1.019923969	0.000132298	0.00103314
CTH	60.78804069	29.83741264	-1.026665081	8.67E-05	0.000744966
CTSL1P8	0.074835458	0.178551253	1.254544347	0.009084261	0.028107097
CTSL2	0.327528848	1.180714957	1.849966833	2.35E-07	6.85E-06
CWH43	0.118955247	0.058161896	-1.032272711	0.002320346	0.009751005
CXCL14	3.737797051	1.729185746	-1.112095389	0.000744898	0.003967388
CXCL2	66.72794739	30.00417457	-1.153127885	9.41E-07	2.00E-05
CYP19A1	0.236340101	0.628393412	1.410803619	9.76E-05	0.000820812
CYP1A2	16.80621626	6.518365003	-1.366412909	2.78E-06	4.74E-05
CYP2A7	51.05659136	10.97035219	-2.218487382	6.85E-06	9.61E-05
CYP2B6	89.84619156	29.75697181	-1.594229632	3.55E-09	2.41E-07
CYP2B7P1	63.25550921	18.74782846	-1.754467636	2.37E-08	1.10E-06
CYP2C8	296.8142289	110.8288561	-1.421226696	2.45E-10	3.19E-08
CYP2D7P1	31.05672527	14.3724215	-1.111602564	2.47E-06	4.33E-05
CYP3A4	599.6159122	240.0209918	-1.320878082	6.78E-07	1.56E-05
CYP4Z1	0.59493185	0.2433443	-1.289725435	4.26E-06	6.65E-05
DDN	0.018918021	0.081901119	2.114121956	1.55E-10	2.37E-08
DFNA5	3.067774008	7.260354096	1.242847703	8.14E-11	1.43E-08
DGCR5	1.435723132	0.663310777	-1.114020692	2.56E-06	4.45E-05
DIRAS1	0.132251099	0.368784473	1.479498206	0.005228138	0.018308117
DIRAS3	1.309625981	0.604485331	-1.115375613	2.69E-08	1.22E-06
DKK1	5.67801212	14.75335429	1.377585166	0.004457606	0.016170459
DLGAP2	0.077040575	0.026435651	-1.543133585	5.49E-05	0.000516302
DLGAP5	1.435909796	3.007541377	1.066619464	1.23E-11	3.67E-09
DLX2	0.035011233	0.158234653	2.176175814	1.50E-07	4.84E-06
DLX4	0.113713766	0.24998969	1.136461685	0.004339214	0.015822947
DLX6	0.080272176	0.36016686	2.165693524	0.000220438	0.001546462
DLX6-AS1	0.057377023	0.273900156	2.255105078	6.62E-05	0.000601656
DMKN	4.316167278	11.95610458	1.469924737	0.003791705	0.014276932
DQX1	0.443145396	1.62604881	1.875518535	0.000641697	0.003527041
DRD1	1.012323436	0.343511108	-1.559241645	3.34E-05	0.000346045
DUSP13	0.065465194	0.363237462	2.47211303	0.007642978	0.024610994
DUSP26	0.117296639	0.448163965	1.933864979	0.005979607	0.02036511
DUSP9	4.63677215	16.82652442	1.859544473	0.000241987	0.001662012
ECHDC2	150.7225123	68.25917352	-1.142800066	1.31E-10	2.06E-08
ELOVL3	0.098441766	0.377565955	1.939386233	3.32E-06	5.46E-05
ENPP3	1.106534574	2.302041386	1.056865241	0.001933881	0.008411395
EPR1	4.333602143	11.29913985	1.382574337	1.86E-13	1.77E-10
ESCO2	0.54026948	1.084193555	1.004871245	2.42E-08	1.12E-06
ESR1	2.06889016	0.814221132	-1.345364483	1.43E-09	1.16E-07
EVPLL	1.174425933	0.541514314	-1.116884351	2.53E-06	4.41E-05
EXO1	1.07929376	2.178624513	1.01332998	1.81E-12	1.05E-09
FABP3	3.033625658	8.002212845	1.399355931	0.00253632	0.010454633
FABP5	22.2893913	54.61306914	1.292889017	0.000236855	0.001633711
FABP6	0.185714695	1.217582108	2.712859182	2.01E-05	0.000232682
FAM131C	0.116311703	0.374197048	1.685801919	0.00363677	0.01384922
FAM153A	0.085983895	0.042861498	-1.004384188	0.001147541	0.005576829
FAM163B	0.86771819	0.394737398	-1.136333365	4.26E-06	6.64E-05
FAM171A2	0.213412892	0.581281817	1.445590449	3.18E-07	8.60E-06
FAM19A4	0.119256545	0.704385542	2.562296855	0.017535252	0.046574228
FAM19A5	1.77663052	0.678022664	-1.389738276	0.006332043	0.02132329
FAM46B	0.089047513	0.299862493	1.751653857	3.43E-05	0.000353199
FAM47C	0.027929709	0.01303746	-1.099137658	0.003713546	0.014051372
FAM64A	0.460911489	1.066886917	1.210845634	0.000127039	0.00100107
FAM65C	1.699788203	0.805444532	-1.077497851	3.93E-06	6.23E-05
FAM99A	13.67578596	4.059796228	-1.752144527	6.61E-08	2.48E-06
FAM99B	2.108464128	0.464092856	-2.183707083	2.78E-07	7.78E-06
FCGBP	0.668893351	1.452309213	1.118500542	8.12E-05	0.000708942
FCN2	5.255858409	1.672142443	-1.652228661	5.73E-08	2.23E-06
FCN3	16.76303758	6.843888241	-1.292395493	1.36E-07	4.44E-06
FER1L6	0.271147406	0.756510278	1.480282312	0.001148706	0.005580813
FGF19	6.14264761	2.300082611	-1.417174943	0.019165492	0.04991123
FGF8	0.026380965	0.059870023	1.1823365	0.001470053	0.00676367
FMO1	1.285666729	3.151949312	1.29372762	0.003826396	0.014368579
FRMD1	0.10324294	0.333478619	1.691551132	0.007365355	0.023958911
FTCD	164.8119602	79.09943457	-1.059081654	1.11E-09	9.59E-08
GABRA3	0.113085396	0.343005331	1.600818367	0.000526942	0.003042254
GABRG2	0.065903811	0.176789271	1.423596924	0.003531798	0.013558143
GABRP	8.878848338	0.611894568	-3.859017561	0.016204548	0.043970166
GABRQ	0.057295777	0.133784758	1.223413055	0.008805362	0.027465112
GAL3ST1	2.625743922	7.103367203	1.435776843	9.93E-05	0.000830057
GAP43	0.121056759	0.325215972	1.425714479	0.004361735	0.015887141
GBA3	20.48135578	8.065221896	-1.344525088	3.49E-08	1.49E-06
GDF1	0.095914548	0.557953343	2.540322931	0.006255442	0.021122576
GDF10	0.078588765	0.394846084	2.328895398	0.004070202	0.015042336
GDF2	0.679178588	0.272833686	-1.315769195	2.52E-05	0.000278059
GINS1	1.691596942	3.501217575	1.04947086	2.21E-12	1.19E-09
GJB6	0.11807191	1.174813984	3.31469466	0.012847889	0.03672056
GLUD2	2.45587861	5.548010426	1.175731247	0.000211925	0.001502348
GLYATL1	49.33967166	23.04725814	-1.098152987	1.00E-09	8.99E-08
GNGT1	0.207705125	0.442219456	1.090225686	0.000297295	0.001944334
GNMT	75.10865733	37.5500096	-1.000165932	1.81E-07	5.67E-06
GPC3	151.9207226	348.9831179	1.199838575	0.000763244	0.00404642
GPR182	0.500658191	0.200851688	-1.317695395	3.11E-08	1.36E-06
GREM2	4.884167241	1.528580699	-1.675919882	1.20E-06	2.42E-05
GRIK3	0.011694038	0.005645519	-1.050595037	0.008674969	0.027163298
GSTA7P	1.302463122	0.488941024	-1.41351016	0.000175467	0.001291422
GTSE1	1.112385314	2.22545431	1.000443278	8.24E-11	1.43E-08
GUCA2A	0.40468442	1.061499546	1.391234542	0.005731242	0.019669108
GUCY1B2	0.317711886	0.727948777	1.196117873	0.000702315	0.003787925
GXYLT2	0.236504691	0.709382369	1.584694672	0.000216955	0.001529096
GYS2	23.42723553	10.58826256	-1.145720847	2.46E-08	1.13E-06
HAMP	107.57131	39.9333826	-1.429626166	0.008465127	0.026645687
HAO2	34.37649911	15.22242343	-1.175224572	4.10E-07	1.05E-05
HAPLN4	3.438763638	1.272873601	-1.433800793	0.00017302	0.001279743
HEATR8	1.960649685	0.747871687	-1.390469116	9.14E-05	0.000777631
HGFAC	56.997092	18.896894	-1.59273919	1.82E-08	8.81E-07
HHIP	0.342886224	0.163585234	-1.06768741	6.91E-05	0.000621412
HIST1H1B	0.070487301	0.145107927	1.041691069	0.000738843	0.003944241
HIST1H2AI	0.232194528	0.496109854	1.09532564	1.09E-05	0.000140525
HIST1H2BL	0.116807242	0.234889036	1.007849643	0.00018344	0.001338434
HIST1H3B	0.336734233	0.860596041	1.353725808	3.41E-05	0.000351319
HMGA2	0.185404283	1.933398	3.382392179	1.23E-05	0.000155288
HMGCLL1	0.097256632	0.046111361	-1.076674381	6.19E-07	1.45E-05
HRSP12	354.714447	165.6593732	-1.098438255	1.92E-10	2.72E-08
HSD3B1	0.592304444	0.147147225	-2.009078574	0.001870119	0.008189185
HSD3B2	0.372702653	0.117899985	-1.660461557	1.25E-09	1.06E-07
HTR1D	0.380566087	1.216862233	1.67694693	0.000512267	0.002980968
HYDIN	0.412770813	0.195927737	-1.075019313	0.001246725	0.005954936
IAPP	0.530799919	0.230657141	-1.202418189	4.08E-06	6.41E-05
IBSP	0.322017282	0.672503003	1.062402595	0.000286867	0.001892115
IDO2	3.534841937	1.429303436	-1.306333478	1.04E-06	2.17E-05
IGDCC3	0.112041411	0.727556896	2.699028017	0.012491401	0.035913635
IGDCC4	0.254504363	0.535733285	1.073824545	0.003588893	0.013718776
IGF1	8.421799469	3.738221552	-1.171776449	1.26E-07	4.17E-06
IGF2BP1	1.066814986	3.550600717	1.734753135	1.96E-05	0.000227415
IGF2BP3	1.853736683	4.581487513	1.305379759	7.39E-10	7.41E-08
IGFALS	7.496673313	2.322138975	-1.690796217	0.000151113	0.001148742
IGSF1	1.114829909	2.538074112	1.186910583	3.74E-05	0.000377259
IL27	5.103930883	2.474750171	-1.044325902	0.000109448	0.000893392
ISL2	0.250348887	0.528687979	1.078476479	0.00018586	0.001351207
JMJD5	7.53546888	3.048723713	-1.30549187	0.000344477	0.002165244
KBTBD11	1.098662591	0.52605782	-1.062455107	6.33E-05	0.000581257
KCNJ4	2.396487733	1.176410189	-1.02653037	1.58E-06	3.02E-05
KIAA0101	3.261338341	6.550830356	1.00621367	3.01E-10	3.83E-08
KIAA1239	0.201738584	0.033347603	-2.596832046	0.004081017	0.015065071
KIF4A	1.508274273	3.238418339	1.102390565	3.13E-12	1.49E-09
KIF4B	0.00530116	0.013858991	1.386442122	0.010340944	0.031067066
KISS1R	0.076731988	0.213713663	1.477779108	0.000609686	0.003398505
KLHDC8A	0.112011808	0.416826763	1.89579709	0.015468084	0.042462272
KLHL38	0.034774441	0.166001155	2.255094067	0.007638134	0.024606678
KNDC1	1.279899038	0.594463831	-1.106369072	0.00371418	0.014051372
KRT7	39.7697353	16.09175267	-1.305349491	0.003191083	0.012536176
KRTAP5-10	0.388532142	0.183197843	-1.084631434	0.000290359	0.001909021
KRTDAP	0.078678902	0.231221724	1.555228225	0.015475032	0.042470891
LARP6	1.746195551	3.730986399	1.09534197	0.008859778	0.027560343
LASS1	0.184041852	1.024545233	2.476877893	0.018315727	0.048191186
LHX3	0.329954822	0.159448028	-1.04918225	9.17E-05	0.000778947
LIN28B	0.267944105	1.578938676	2.558951156	0.007671144	0.024675361
LINGO4	0.955190328	0.433879872	-1.13849257	4.29E-06	6.65E-05
LOC100129722	4.533892947	2.141560998	-1.082087557	0.000419804	0.002538942
LOC100130417	0.589946747	0.258625387	-1.18972083	2.98E-06	5.00E-05
LOC100130673	0.113963797	0.229577604	1.010406315	0.000622238	0.003452981
LOC100271702	0.056032066	0.020975599	-1.417540681	0.002576902	0.010570664
LOC100287314	0.167808493	0.591685524	1.818014869	1.17E-05	0.000149508
LOC100287792	0.070048477	0.163808433	1.225584046	0.005358686	0.018640011
LOC100289255	0.331731811	0.134963327	-1.297449926	6.02E-07	1.42E-05
LOC100289473	0.062369089	0.128753314	1.045706471	8.65E-05	0.000744763
LOC100292680	1.004316907	2.211924105	1.139087309	0.003916723	0.014615558
LOC100499467	0.687115254	1.688665621	1.297259666	2.75E-05	0.000297323
LOC100505835	0.079060487	0.19932932	1.334125197	0.005741734	0.019696743
LOC100506229	8.071891518	1.79638639	-2.167809089	1.58E-09	1.24E-07
LOC100506305	0.111909366	0.588054497	2.393619069	0.017777686	0.047093906
LOC100506343	0.080311158	0.16088286	1.002338286	1.26E-07	4.17E-06
LOC100506433	0.227814928	0.721552985	1.663243051	0.000297608	0.001945591
LOC100507091	0.298157879	0.070112974	-2.088323133	0.018580328	0.048700895
LOC100507401	0.112892484	0.274102858	1.279767927	7.05E-09	4.05E-07
LOC100507582	0.753305653	0.340674463	-1.144841551	0.016181822	0.043918204
LOC157273	2.661528664	1.166213703	-1.190422924	4.19E-05	0.000413138
LOC170425	0.036887331	0.098973797	1.423921203	0.001294521	0.006132463
LOC284576	0.022097446	0.010481533	-1.076029924	0.011444107	0.033600163
LOC285441	34.04649654	15.18291656	-1.165057398	5.19E-12	1.86E-09
LOC286359	0.01691078	0.034715221	1.037625149	0.002307271	0.009703632
LOC338963	0.038770436	0.018211928	-1.090073269	0.01772502	0.046985555
LOC339240	0.150267318	0.062270306	-1.270914998	5.57E-06	8.18E-05
LOC339535	0.432925639	1.324342953	1.613085622	5.16E-08	2.04E-06
LOC400620	0.033768847	0.071954275	1.091387488	0.005414986	0.018795376
LOC401109	0.399049987	0.144710783	-1.463397045	4.08E-05	0.000404355
LOC440173	0.097079544	0.383277446	1.981149868	1.80E-06	3.34E-05
LOC440910	0.169823598	0.54536902	1.683195804	0.008809693	0.027466148
LOC441666	0.176294207	0.399295234	1.179470785	0.000289005	0.001902439
LOC643037	0.587210939	0.283694402	-1.04954116	2.34E-05	0.000264325
LOC643770	1.961857335	0.955070901	-1.03854039	6.43E-05	0.000588615
LOC645166	0.677484875	1.61607417	1.254232769	2.89E-07	8.02E-06
LOC645277	5.316785834	1.551574231	-1.776821634	4.73E-09	3.04E-07
LOC646903	0.05533823	0.157561032	1.509562372	0.000311256	0.002012825
LOC647946	0.092821526	0.252056018	1.441213079	0.001680688	0.007537433
LOC728978	0.106241362	0.292676015	1.461958979	0.015147032	0.041819375
LOC728989	2.192789931	0.710165804	-1.626539811	1.13E-08	5.97E-07
LOC729080	0.022730826	0.010433684	-1.123401459	0.001497549	0.006859895
LOC92659	0.572398503	1.182084958	1.046241923	9.72E-07	2.05E-05
LRP2	0.121038877	0.369418031	1.609783772	0.000919246	0.004706654
LRP4	0.485980999	1.047899617	1.108528709	3.32E-05	0.000344211
LST-3TM12	2.558592616	0.954232167	-1.422938231	0.000167332	0.001249687
LY86-AS1	0.1498554	0.072044	-1.056620889	0.007838975	0.025060518
MAB21L2	1.027305448	0.371269119	-1.468327974	0.000395774	0.002418052
MAGEA3	2.594167317	5.923384098	1.191150107	0.011510354	0.033776251
MAGEA6	2.574525105	5.484076423	1.090942337	0.016725269	0.044962555
MAMSTR	0.426261295	0.89126361	1.064114141	3.00E-08	1.32E-06
MCM10	0.537160229	1.306788627	1.282601406	6.08E-14	1.09E-10
MCM2	4.059094146	8.961820738	1.142634067	7.18E-13	4.70E-10
MCOLN3	0.691894274	1.515895228	1.131546537	0.00014088	0.001088029
MEP1A	3.302787048	7.265600731	1.137398134	0.001094138	0.005375521
METTL11B	0.037747932	0.159542685	2.079472968	8.58E-05	0.000740013
MFAP2	2.004600514	5.234790353	1.384817001	0.003881827	0.014527864
MFSD2A	21.45067348	9.87320127	-1.119433102	3.91E-07	1.00E-05
MIP	0.209429102	0.083278248	-1.330450311	0.000127647	0.001004389
MIR455	0.125684158	0.053689585	-1.227088645	0.001309862	0.006194235
MMP1	0.857649367	1.878376397	1.131026329	3.39E-06	5.55E-05
MMP10	0.229757086	0.665964082	1.535335013	0.000484507	0.002855427
MMP11	8.783721874	19.21853389	1.129594004	0.000170514	0.001265264
MMP12	0.846745524	8.645333992	3.351921339	2.34E-05	0.000264268
MPP2	0.110996637	0.285014178	1.360517721	3.98E-06	6.28E-05
MPPED1	4.481982626	2.03580601	-1.138536962	9.23E-06	0.000122317
MYBL2	2.950067846	9.544854528	1.693975076	5.72E-13	4.20E-10
MYO7B	1.740410752	0.754973368	-1.204930176	1.10E-07	3.74E-06
NAA11	0.344884701	1.053315476	1.610751562	0.001964541	0.008519516
NAT8L	0.06167582	0.220818575	1.840084647	0.009097755	0.028138152
NAV2-AS4	0.252282197	0.111172439	-1.182239229	2.78E-05	0.000299949
NCRNA00238	0.948668291	0.423223911	-1.16448259	0.00342579	0.01323612
NCRNA00256A	0.030786675	0.064998499	1.078100325	0.004434679	0.016098382
NECAB2	21.1478207	10.45474514	-1.016351107	0.000246346	0.001686935
NEIL3	0.742595501	1.57727037	1.086781504	1.53E-06	2.94E-05
NEK2	2.467769999	4.950500655	1.004366496	1.74E-10	2.57E-08
NFE2	0.225561517	0.472561543	1.066981278	0.013942699	0.039182893
NKAIN1	0.007611193	0.116030949	3.930243286	1.70E-08	8.37E-07
NMB	2.49472459	5.218391451	1.064724615	4.33E-08	1.78E-06
NPB	1.635458414	3.938016116	1.267773941	2.76E-05	0.000297966
NPBWR1	0.329025862	0.135882365	-1.275842758	0.003285518	0.012814753
NPFFR2	0.501490858	1.048345606	1.063819101	0.003670531	0.013930913
NR2E1	0.033492047	0.067583728	1.012857365	0.017554478	0.046609968
NRSN2	2.574345763	5.239099308	1.025112972	3.02E-05	0.000320363
NT5DC2	7.518306638	15.63840693	1.056613891	0.001456324	0.006711971
NXF3	0.728136457	0.236826519	-1.620378207	0.003936979	0.014680969
NXPH3	0.071090305	0.245391702	1.787361726	0.001246598	0.005954936
NXPH4	0.878848579	2.817484415	1.680721107	6.65E-06	9.41E-05
OASL	23.95191682	11.377325	-1.07397972	9.24E-05	0.000784034
OGDHL	27.94047649	13.86386828	-1.011026771	1.22E-09	1.03E-07
OR2A14	0.024471429	0.006433877	-1.927338181	0.013343287	0.037815344
P2RX2	1.233478862	0.065048539	-4.245072532	0.003354232	0.013024839
PACSIN1	0.211526146	0.558311023	1.400233036	0.000331397	0.002097437
PADI1	1.737909137	0.532283088	-1.707087022	0.00463579	0.016622987
PAK6	0.352762552	0.766967889	1.12046876	9.91E-09	5.39E-07
PBK	2.068341165	4.721720439	1.190838453	6.05E-12	2.08E-09
PCK1	344.6946185	147.8049683	-1.22162401	5.19E-08	2.04E-06
PDGFRL	0.626646904	1.272615717	1.022072181	2.97E-06	5.00E-05
PEG10	23.69874687	54.28870611	1.195841325	1.24E-05	0.000156389
PFKFB4	0.812284852	1.874922282	1.206773151	2.98E-08	1.32E-06
PFN2	4.836397951	12.17187964	1.331547111	5.62E-06	8.23E-05
PIN1P1	0.009073626	0.023152093	1.351391519	0.000694836	0.003760264
PITX1	1.173264769	3.451927949	1.55687373	0.001699817	0.007591608
PITX3	0.013597883	0.036844779	1.438078093	0.000289814	0.001906987
PKIB	3.026788795	7.28882587	1.267898425	0.003034514	0.012055963
PLA2G2A	298.6336524	87.47457488	-1.771441096	0.001254674	0.005984057
PLA2G3	0.014379638	0.036952465	1.361643276	0.000509129	0.002966979
PLCH2	4.053169072	1.041365795	-1.960573431	4.71E-09	3.04E-07
PLGLA	2.751316599	1.357015429	-1.019685039	2.67E-06	4.59E-05
PLIN5	48.12146173	22.31682479	-1.10854869	1.13E-08	5.95E-07
PLK1	2.516771165	5.185209508	1.042828235	1.63E-11	4.42E-09
PNCK	0.200360508	0.913121438	2.188208567	0.000118059	0.000950712
PNPLA7	4.689495901	2.269224392	-1.047233571	1.40E-07	4.55E-06
POPDC3	0.362103299	0.793472462	1.131778834	0.005062483	0.017871362
POTEF	0.028435683	0.096054066	1.756144202	0.017309033	0.046117452
POU3F2	0.017580226	0.093730743	2.414568695	0.000303565	0.001973752
PPFIA4	0.178597882	0.463021353	1.374363758	3.27E-07	8.77E-06
PPP1R9A	0.514212294	1.054799047	1.036532164	0.006339686	0.021335683
PRAME	1.635003308	5.21715502	1.673969747	0.001671305	0.007501424
PRG2	6.267589694	2.841785921	-1.141112861	1.53E-06	2.95E-05
PROZ	22.25980924	10.85535374	-1.036034489	0.000760775	0.004034656
PRR11	0.75827795	1.833227279	1.273586982	2.31E-13	1.97E-10
PRR19	1.053994304	2.3313559	1.14530219	3.16E-10	3.90E-08
PRSS35	0.265759752	0.736247198	1.470067604	0.005832449	0.019957082
PTCHD1	0.042870838	0.018021089	-1.250310438	0.012963351	0.036965573
PTPLA	0.415179101	1.355810827	1.707350167	0.004031347	0.014946611
PTPRN	0.049856385	0.459520985	3.204280563	8.72E-06	0.000116374
PWRN1	0.171906986	0.083232104	-1.046416162	4.43E-05	0.000433467
PYCR1	4.501353878	12.92962555	1.522249601	6.02E-05	0.000556911
PYY	0.332131872	0.692559063	1.060180941	0.016372959	0.044233224
PZP	2.306421179	0.819086213	-1.493568773	1.05E-06	2.18E-05
QPCT	1.579085449	3.445810374	1.125754069	0.000998538	0.005004773
RAD51	0.876879239	1.965589809	1.164512204	3.47E-14	7.01E-11
RBP2	0.391338389	2.881569178	2.88036611	0.000932586	0.004753987
RCOR2	0.163766408	0.531569912	1.698619988	0.000156717	0.001184963
RDH16	107.575053	51.11609238	-1.073494094	9.12E-08	3.24E-06
RDM1	0.448362994	0.970653069	1.114288532	2.82E-08	1.26E-06
REEP2	0.263803343	0.580741612	1.138433566	1.87E-06	3.45E-05
RENBP	3.830762199	8.982525181	1.229489604	0.010524669	0.031443593
RFX6	0.07380643	0.257353056	1.801930505	0.004566036	0.016436656
RGS20	0.077858285	0.215953476	1.471798068	0.001058442	0.005233584
RGS9BP	0.024968244	0.05390783	1.110400465	9.85E-05	0.000826391
RMI2	2.115015512	4.326011047	1.032369105	1.92E-08	9.20E-07
RNF165	0.369564373	0.165868835	-1.155782844	1.94E-06	3.54E-05
RPE65	0.020150402	0.043843607	1.121557866	0.00061538	0.003421977
RRM2	5.631057945	11.32105006	1.007529877	1.87E-10	2.72E-08
RUNDC2C	1.262258624	0.481674513	-1.38987704	1.10E-09	9.53E-08
RUNDC3A	0.20364796	0.793896523	1.962873617	0.013770555	0.03881614
RXFP4	0.007443622	0.056729937	2.93003354	0.000659338	0.003604648
S100A2	0.70140877	19.10538011	4.767579682	0.011678661	0.034183203
S100A3	0.308466785	0.974587619	1.659676743	1.53E-05	0.000185034
S100P	50.25237701	116.8546297	1.217451149	0.007413946	0.024088071
SAA1	1120.075191	318.1504242	-1.815814634	6.63E-05	0.000602228
SAA2	249.3296133	90.47909721	-1.462397805	0.00141107	0.006561494
SAA2-SAA4	278.3703421	134.9393435	-1.044694465	4.33E-06	6.69E-05
SALL2	0.580003006	1.220386518	1.073205865	1.17E-05	0.000149508
SCNN1A	6.590495348	2.203346823	-1.5806903	2.32E-07	6.79E-06
SDC4P	0.147270968	0.031405133	-2.229400789	1.14E-05	0.000145752
SEC14L3	0.845714882	0.366546289	-1.206175968	2.62E-07	7.42E-06
SERPINI1	3.244796492	7.254713025	1.160790549	1.42E-05	0.000174797
SFN	8.808680927	17.97716599	1.029167704	0.000248996	0.001701475
SFRP1	0.631288307	0.258114036	-1.290290431	0.00010295	0.00085592
SH2D5	0.088044048	0.243208574	1.465896714	0.006828316	0.02264517
SHCBP1	0.769209036	1.698371811	1.142704715	2.40E-11	5.61E-09
SHOX2	0.174888094	0.371230863	1.085884584	0.006333585	0.021324039
SIX2	0.24638665	0.597211785	1.277318544	0.000907046	0.004658959
SKA1	0.978921296	2.24942633	1.20029234	1.84E-11	4.68E-09
SLC22A1	116.6653348	45.22992252	-1.367026522	7.26E-11	1.41E-08
SLC22A16	0.070828794	0.170953006	1.271191903	0.000173509	0.00128088
SLC25A47	74.62349216	23.20629351	-1.685113761	1.24E-06	2.50E-05
SLC29A4	2.028075322	8.168231058	2.009912442	6.39E-06	9.14E-05
SLC6A13	8.170138869	3.422866536	-1.25515556	6.44E-07	1.50E-05
SLC6A4	0.040002801	0.150427349	1.910893963	0.003128328	0.012346694
SOAT2	2.019144515	4.238085747	1.069668606	0.000988851	0.00496707
SOHLH2	0.459633263	1.485092759	1.691997933	0.008629943	0.02704328
SOX11	0.025465727	0.061894567	1.281255862	0.004108135	0.015140957
SPACA1	0.291300438	0.1274718	-1.192329748	0.014100307	0.039517064
SPACA7	0.096543196	0.043765659	-1.1413753	0.000577981	0.003270297
SPERT	0.019870322	0.128940427	2.698017503	4.68E-05	0.000453986
SPHK1	5.582493572	12.77450703	1.194286029	0.000670502	0.003649359
SPINK4	0.263025472	16.08379921	5.934261902	0.004048563	0.014999093
SPOCD1	0.315662371	0.876706293	1.47371131	0.000322198	0.002057177
SPOCK1	0.880073078	2.106296676	1.259013427	3.05E-06	5.11E-05
SRSF12	0.28351514	0.578155968	1.028032958	2.91E-06	4.91E-05
ST6GALNAC5	0.13746485	0.35383231	1.364003026	4.90E-05	0.000471299
STAB2	1.421856781	0.607192631	-1.227549968	7.13E-05	0.000638495
STARD6	0.055811378	0.162449126	1.541356811	0.016297092	0.044131005
SULT4A1	2.38542009	1.064445659	-1.164141057	0.005212231	0.018263769
SYT10	0.036786009	0.00920501	-1.998666041	7.21E-07	1.63E-05
TAF7L	0.739863738	0.277823926	-1.413088741	8.34E-07	1.84E-05
TAG	0.17103655	0.343773794	1.007154918	0.009757583	0.02975722
TCF24	0.018394286	0.112570181	2.613495127	7.69E-07	1.73E-05
TGM4	0.032650825	0.071804033	1.13694543	0.000312935	0.002020162
THRSP	37.17986496	14.76970787	-1.331880239	1.55E-05	0.000187134
TIMD4	1.740224972	0.727052661	-1.259142058	0.005573637	0.019205746
TLR10	0.657046606	0.273324298	-1.265381988	0.004054788	0.014999093
TM4SF19	0.715450377	3.305648339	2.208009645	9.44E-09	5.17E-07
TM4SF19-TCTEX1D2	1.163757016	3.581311407	1.621698106	2.39E-07	6.88E-06
TMEM132A	2.611031394	6.292608329	1.269038344	0.001640709	0.007391954
TMEM132C	0.025826536	0.010155423	-1.346603852	0.009912081	0.03011468
TMEM88B	0.12136334	0.336950835	1.473205411	0.00328029	0.012802561
TMSB15A	0.164001873	0.413223705	1.333210726	0.000255345	0.001730942
TNFSF14	49.84999429	19.50094209	-1.354049517	4.78E-06	7.27E-05
TNNT1	1.027786475	3.316423479	1.690087666	0.01261683	0.036213979
TOP2A	6.239921583	13.00846159	1.059850552	1.01E-10	1.69E-08
TPPP2	2.458272327	1.103550215	-1.155492468	3.39E-05	0.000350061
TPX2	4.692047473	9.563685763	1.027349118	1.99E-12	1.11E-09
TREM1	0.752885903	1.586450422	1.075299285	0.001645547	0.007409915
TREM2	5.052449922	11.4397298	1.178997954	0.000598275	0.003347607
TRIM17	0.232992914	0.493688918	1.083316184	0.001438035	0.006658211
TRIM50	1.700184487	4.525886071	1.412508967	0.010275107	0.030920084
TRIM71	0.174426331	0.499149187	1.516853236	0.000172799	0.001279284
TRIP13	1.576170422	3.570338161	1.179637191	5.00E-13	3.85E-10
TRNP1	6.988262726	14.49728526	1.052777016	0.001079149	0.005313187
TROAP	2.835930496	6.038272467	1.090313682	3.29E-10	3.97E-08
TTC36	31.2713541	6.928105877	-2.174308809	5.28E-09	3.28E-07
TTK	1.447942409	3.009388753	1.055466265	3.24E-12	1.49E-09
TYRO3	1.082995449	2.333566845	1.107509614	3.89E-06	6.19E-05
UBE2C	10.50894361	21.9265853	1.061063501	8.90E-09	4.92E-07
ULBP2	0.528374785	1.138203083	1.107124468	0.01756513	0.046615264
UPK3A	2.272075102	5.332239774	1.230731132	6.83E-05	0.000616709
VGF	0.022298073	0.550051978	4.624577001	0.005562048	0.019169902
VIL1	9.225651006	19.70274798	1.094674236	0.000408379	0.002479129
VIPR1	2.596765184	1.22553461	-1.083304335	1.14E-07	3.87E-06
WDR65	3.405479761	1.555534815	-1.130447374	4.29E-09	2.83E-07
WNT7A	0.112151766	0.049194916	-1.188871218	0.002800597	0.011324368
WT1-AS	0.073165054	0.033463104	-1.128583454	0.014866676	0.041221471
ZNF492	0.049747672	0.143968766	1.533054936	0.00028278	0.001873971
ZNF556	0.026921396	0.128576242	2.255798939	0.017199742	0.045962718
ZNF681	0.240395476	0.503068703	1.065345692	4.69E-07	1.16E-05
ZNF695	0.139477881	0.388130206	1.476504364	0.00374182	0.014119448
ZNF835	0.067992052	0.177522249	1.384561845	9.05E-05	0.000771924
ZNF90	0.146566669	0.397871671	1.440746122	0.000522589	0.003026883
ZSCAN4	0.074702974	0.033537558	-1.155388023	0.000938139	0.004776051
